# Supplementary material for: Cross-sectional association between ZIP code-level gentrification and homelessness among a large community-based sample of people who inject drugs in 19 US cities
Source: PubMed Central journal article supplement — BMJ Open. 2017 Jun 20;7(6):e013823. doi: 10.1136/bmjopen-2016-013823 (PMC5541298; doi:10.1136/bmjopen-2016-013823), 2017-06-20
Supplement: bmjopen-2016-013823.draft_revisions.pdf [file bmjopen-2016-013823.draft_revisions.pdf]

# BMJ Open

## ZIP code-level gentrification and inadequate housing are associated with homelessness among a large urban US sample of people who inject drugs

|                                 |                                                                                                                                                                                                                                                                                                                                                                                                                                                                                                                                                                                                                                                                                                                                                                                                                                                                                                                                                                                                                                                                                                                                                                                                               |
|---------------------------------|---------------------------------------------------------------------------------------------------------------------------------------------------------------------------------------------------------------------------------------------------------------------------------------------------------------------------------------------------------------------------------------------------------------------------------------------------------------------------------------------------------------------------------------------------------------------------------------------------------------------------------------------------------------------------------------------------------------------------------------------------------------------------------------------------------------------------------------------------------------------------------------------------------------------------------------------------------------------------------------------------------------------------------------------------------------------------------------------------------------------------------------------------------------------------------------------------------------|
| Journal:                        | <i>BMJ Open</i>                                                                                                                                                                                                                                                                                                                                                                                                                                                                                                                                                                                                                                                                                                                                                                                                                                                                                                                                                                                                                                                                                                                                                                                               |
| Manuscript ID                   | bmjopen-2016-013823                                                                                                                                                                                                                                                                                                                                                                                                                                                                                                                                                                                                                                                                                                                                                                                                                                                                                                                                                                                                                                                                                                                                                                                           |
| Article Type:                   | Research                                                                                                                                                                                                                                                                                                                                                                                                                                                                                                                                                                                                                                                                                                                                                                                                                                                                                                                                                                                                                                                                                                                                                                                                      |
| Date Submitted by the Author:   | 11-Aug-2016                                                                                                                                                                                                                                                                                                                                                                                                                                                                                                                                                                                                                                                                                                                                                                                                                                                                                                                                                                                                                                                                                                                                                                                                   |
| Complete List of Authors:       | Linton, Sabriya; Emory University School of Public Health, Behavioral Sciences and Health Education<br>Cooper, Hannah; Emory University School of Public Health, Behavioral Sciences and Health Education<br>Kelley, Mary; Emory University, Department of Biostatistics and BioInformatics<br>Karnes, Conny; Emory University School of Public Health, Behavioral Sciences and Health Education<br>Ross, Zev; ZevRoss Spatial Analysis,<br>Wolfe, Mary; Emory University School of Public Health, Behavioral Sciences and Health Education<br>Friedman, Samuel; National Development and Research Institutes, Institute for Infectious Disease Research<br>Des Jarlais, Don; Mount Sinai Beth Israel, Baron Edmond de Rothschild Chemical Dependency Institute<br>Semaan, Salaam; Centers for Disease Control and Prevention<br>Tempalski, Barbara; National Development and Research Institutes , Institute for Infectious Disease Research<br>Sionean, Catlainn; Centers for Disease Control and Prevention<br>DiNenno, Elizabeth; Centers for Disease Control and Prevention<br>Wejnert, Cyprian; Centers for Disease Control and Prevention<br>Paz-Bailey, G; Centers for Disease Control and Prevention |
| <b>Primary Subject Heading</b>: | Public health                                                                                                                                                                                                                                                                                                                                                                                                                                                                                                                                                                                                                                                                                                                                                                                                                                                                                                                                                                                                                                                                                                                                                                                                 |
| Secondary Subject Heading:      | Epidemiology, Addiction, HIV/AIDS                                                                                                                                                                                                                                                                                                                                                                                                                                                                                                                                                                                                                                                                                                                                                                                                                                                                                                                                                                                                                                                                                                                                                                             |
| Keywords:                       | PUBLIC HEALTH, EPIDEMIOLOGY, HIV & AIDS < INFECTIOUS DISEASES, Substance misuse < PSYCHIATRY                                                                                                                                                                                                                                                                                                                                                                                                                                                                                                                                                                                                                                                                                                                                                                                                                                                                                                                                                                                                                                                                                                                  |
|                                 |                                                                                                                                                                                                                                                                                                                                                                                                                                                                                                                                                                                                                                                                                                                                                                                                                                                                                                                                                                                                                                                                                                                                                                                                               |

SCHOLARONE™  
Manuscripts

## **ZIP code-level gentrification and inadequate housing are associated with homelessness among a large urban US sample of people who inject drugs**

Sabriya L. Linton,<sup>1</sup> Hannah L.F. Cooper,<sup>1</sup> Mary E. Kelley,<sup>1</sup> Conny C. Karnes,<sup>1</sup> Zev Ross,<sup>2</sup> Mary E Wolfe,<sup>1</sup> Samuel R. Friedman,<sup>3</sup> Don Des Jarlais,<sup>4</sup> Salaam Semaan,<sup>5</sup> Barbara Tempalski,<sup>3</sup> Catlainn Sioanean,<sup>5</sup> Elizabeth DiNenno,<sup>5</sup> Cyprian Wejnert,<sup>5</sup> Gabriela Paz-Bailey,<sup>5</sup> for the National HIV Behavioral Surveillance Study Group

### **Affiliations:**

**1** Rollins School of Public Health of Emory University  
1518 Clifton Road NE,  
Atlanta, GA 30322 USA

**2** ZevRoss SpatialAnalysis  
120 N Aurora St, Suite 3A  
Ithaca, NY 14850 USA

**3** Institute for Infectious Disease Research  
National Development and Research Institutes  
71 West 23rd Street, 4th Fl  
NY, NY 10010 USA

**4** Baron Edmond de Rothschild Chemical Dependency Institute  
Mount Sinai Beth Israel  
39 Broadway, Suite 530  
New York NY 10006 USA

**5** Centers for Disease Control and Prevention  
1600 Clifton Rd NE  
Atlanta, GA 30333

### **Corresponding Author**

Sabriya L. Linton, PhD, MPH  
Behavioral Sciences and Health Education  
Rollins School of Public Health of Emory University  
1518 Clifton Road NE, Room 552  
Atlanta, GA 30312  
Email: [sabriya.linton@emory.edu](mailto:sabriya.linton@emory.edu)  
Phone: 404-727-8295  
Fax: 404-727-1369

## Strengths and limitations

- Although homelessness has been associated with HIV, HCV, and related risk behaviors among people who inject drugs in multiple settings, few empirical studies investigate the relationships of place-level housing and economic characteristics to homelessness.
- This study fills gaps in prior research on homelessness by documenting associations of ZIP code-level gentrification and inadequate housing with homelessness among people who inject drugs in the United States.
- The cross-sectional design and targeted sampling strategy should be considered when interpreting the findings from this study.

For peer review only

# ZIP code-level gentrification and inadequate housing are associated with homelessness among a large urban US sample of people who inject drugs

## Abstract

### Background

Housing instability has been associated with poor health outcomes among people who inject drugs (PWID). This study investigates associations of local-level housing and economic conditions with homelessness among a large urban sample of PWID, an underexplored topic to date.

### Methods

PWID in this cross-sectional study were recruited from 19 large cities in the US as part of National HIV Behavioral Surveillance (NHBS). PWID provided self-reported information on demographics, behaviors, and life events. Homelessness was the primary outcome of this study and was defined as residing on the street, or in a shelter, single room occupancy hotel, or car; or temporarily residing with friends or relatives any time in the past year. Data on county-level rental housing unaffordability and ZIP code-level gentrification (e.g., index of percent increases in non-Hispanic white residents, household income, gross rent from 1990-2009), and current inadequate housing (i.e., index of percent of households lacking plumbing/kitchen facilities), and economic deprivation were measured using data from the US Census Bureau and Department of Housing and Urban Development. Multilevel models evaluated associations of local economic and housing characteristics to homelessness.

### Results

Sixty percent (5,394/8992) of participants reported homelessness in the past year. Adjusted models demonstrated that PWID living in ZIP codes with higher levels of gentrification or inadequate housing had higher odds of past-year homelessness (gentrification: AOR=1.10, 95% CI=1.04, 1.15; inadequate housing: AOR=1.12, 95% CI = 1.04,1.15).

### Conclusions

Evaluation of urban planning strategies to minimize negative implications of gentrification and increase access to adequate housing may reduce homelessness among PWID.

## Introduction

Safe and stable housing has been deemed a key social determinant of health by public health bodies, including the World Health Organization and United States Department of Health and Human Services.<sup>1,2</sup> As described by Aidala and Sumartojo, “*unsafe and unstable housing conditions serve as the intermediary by which inequities in social and economic conditions and policies influence health*”.<sup>3</sup> Consistent with this perspective, housing remains a key structural factor targeted by global Health in All Policies approaches and domestic structural interventions (e.g., Housing Opportunity for People Living with AIDS (HOPWA)).<sup>2,4</sup>

Despite several public health bodies recognizing housing as an important health determinant and despite declines in the percent of homeless persons who were unsheltered in the United States from 40% in 2007 to 31% in 2014, a recent study by the Department of Housing and Urban Development (HUD) reported that on a single night in 2014 more than 578,000 people experienced homelessness.<sup>5</sup> This suggests that the United States is far from attaining its goal of ending homelessness.

People who inject drugs (PWID) are particularly vulnerable to homelessness.<sup>6-14</sup> Homelessness among PWID has dire consequences for their health. Homelessness has been associated with relapse among former injectors,<sup>8,15,16</sup> and among former and active injectors, homelessness has been associated with injection and sexual risk behaviors,<sup>8,10,14,17-20</sup> the transmission of infectious diseases<sup>13</sup>, opiate overdose,<sup>21</sup> and lower rates of drug treatment enrollment and retention,<sup>18,22-24</sup> drug cessation<sup>15,16,25</sup>, and antiretroviral adherence among those who are HIV positive.<sup>26</sup>

Evaluations of “Housing First” interventions further support the importance of stable housing among PWID.<sup>17,27,28</sup> These interventions provide housing to unstably housed individuals without requiring participants to first engage in drug or mental health treatment. Although most of these evaluations have not been conducted exclusively among PWID, those conducted among individuals with co-occurring disorders (e.g., mental illness and substance use) suggest that Housing First interventions improve housing stability, drug treatment retention,<sup>27</sup> health behaviors and health outcomes.<sup>28,17</sup>

The determinants of homelessness that have been identified among PWID and other populations in prior literature have largely been individual characteristics, including socio-demographic status, mental health status, history of substance use, HIV status, and social network characteristics.<sup>9,17,29,30</sup> With the exception of qualitative research,<sup>18,31</sup> most research has not explored the potential influence of local place-based factors on homelessness.

Homelessness has been hypothesized to result from several place-based factors, including unaffordable housing, economic deprivation, inadequate housing (e.g. lacking plumbing etc.) and overcrowding.<sup>32-34</sup> Homelessness has also been hypothesized to be a consequence of urban redevelopment and gentrification processes that may exacerbate law enforcement activity and cause landlords to intentionally disinvest in maintenance and repair of properties that ultimately get repurposed or demolished.<sup>35-39</sup> Urban redevelopment and gentrification may also reduce affordable housing stock by increasing rent and housing market value; increase demand for social services; and potentially cause the needs of marginalized groups to go unmet.<sup>34-38,40-44</sup> Empirical data are lacking, however, on the extent to which place-based factors relate to homelessness. One early study conducted among shelter residents in Philadelphia and New York City is among the few studies that have explored this line of research. This study demonstrated that the

majority of shelter residents reported prior addresses that were located in economically deprived neighborhoods.<sup>32</sup>

This current study provides a rare opportunity to advance knowledge of possible connections of place-based factors with homelessness among PWID by linking individual-level data on homelessness among a large community-based sample of PWID to administrative data on economic and housing conditions at ZIP code and county levels. Figure 1 presents a conceptual framework that outlines pathways through which key local characteristics may lead to homelessness among PWID based on prior literature discussed above.<sup>8,9,17,29,30,32-34,36,40-43</sup> Boxes with dashed borders denote characteristics that are not measured in the current study.

### **Figure 1. Conceptual framework linking local economic and housing factors to homelessness among people who inject drugs (PWID)**

#### **Methods**

##### *NHBS study sample*

PWID were recruited by respondent-driven sampling (RDS) for the Centers for Disease Control and Prevention's 2009 National HIV Behavioral Surveillance (NHBS). NHBS sampling procedures have been described elsewhere.<sup>45</sup> Briefly, its 2009 PWID surveillance cycle was implemented in 20 MSAs with high AIDS prevalence in 2006.<sup>46</sup> Eligible participants included those who had not already participated in the 2009 cycle of NHBS; were  $\geq 18$  years; reported injection drug use in the past year; demonstrated evidence of injection (e.g., track marks); resided in an NHBS-eligible MSA; and provided oral consent. Participants enrolled at the San Juan-Bayamon site were excluded because administrative data on several place-based characteristics are not available for this MSA. A total of 9882 participants met eligibility criteria in the remaining 19 MSAs.

Analysis was restricted to 9,702 PWID who self-identified as Hispanic/Latino, non-Hispanic/Latino black, and non-Hispanic/Latino white.<sup>47</sup> Participants were excluded from the analytic sample if they had invalid/incomplete surveys ( $n=26$ ); invalid or missing ZIP code information ( $n=499$ ); were transgender persons who comprised too small a category to be analyzed ( $n=51$ ); or were missing information on key covariates ( $n=134$ ). The final analytic sample included 8992 participants.

##### *Data collection and measures*

Trained interviewers collected self-reported individual-level data on PWID, including demographics, behaviors, life events, and ZIP codes and counties where they resided using standardized questionnaires. Participants were assigned to MSAs and regions based on interview site. When possible, participants who reported homelessness at the time of their interview were assigned to the ZIP code where they reported they frequently slept. When participants lived in ZIP codes that crossed county lines they were assigned to the county where most participants living in that ZIP code reported residing ( $n=341$ ).

The outcome, individual-level homelessness was defined as self-reported homelessness, or residing on the street, in a shelter, single room occupancy hotel, or car; or temporarily residing with friends or relatives at any time in the past 12 months.

ZIP- and county-level factors were selected based on the conceptual framework described above. Definitions and sources of these factors are detailed in Table 1. Factors were created using data from the 2009 HUD Picture of Subsidized Households and US

1 Census Bureau's 1990 Decennial Census and 2007-2011 American Community Survey  
2 (ACS). County-level factors were percent unaffordable rental units among low-income  
3 households (% occupied rental units where  $\geq 35\%$  of household income was spent on  
4 rent among low-income households, 2007-2011 ACS) and average number of months  
5 that applicants were on waiting lists for assisted housing (2009 Picture of Subsidized  
6 Households). ZIP code-level factors were economic deprivation (e.g., index of %  
7 residents in poverty, 2007-2011 ACS), gentrification between 1990 and 2009 (e.g., index  
8 of % increases in % non-Hispanic white residents and median household income, 1990  
9 Decennial Census and 2007-2011 ACS), percent household crowding (percent of  
10 occupied housing units with  $>1.5$  people per room, 2007-2011 ACS), and inadequate  
11 housing (index of % occupied housing units lacking plumbing or kitchen facilities, 2007-  
12 2011 ACS). The US Census Bureau defines housing units to be a house, an apartment, a  
13 mobile home or trailer, a group of rooms, or a single room that is occupied. Group  
14 quarters (e.g., treatment centers, correctional facilities, and homeless shelters) are not  
15 defined as housing units.<sup>48</sup>

17 Individual-level covariates were also selected based on previous research and included  
18 age, gender, race and ethnicity, full-time employment, and self-reported HIV status (i.e.,  
19 indeterminate/unknown, negative, positive) at the time of the interview, and self-  
20 reported personal annual income dichotomized at the median ( $> \$5,000$  USD vs  $\leq$   
21  $\$5,000$  USD), daily injection, binge drinking, non-injection drug use, and having a main  
22 or casual sexual partner in the past year. Incarceration (i.e., held in a jail or prison for at  
23 least one day in the past year) was hypothesized to be a mediator of several pathways  
24 relating place-based factors to homelessness. Measures of mental health status, a well-  
25 established predictor of homelessness, were not measured in this study.

### 27 *Ethics*

28  
29  
30 The Institutional Review Boards (IRBs) of Emory University and each NHBS site and the  
31 CDC approved study protocols.

### 32 *Analysis*

33  
34  
35 The distributions of all characteristics were determined using descriptive statistics. To  
36 prevent possible multicollinearity, the correlations between place-based characteristics  
37 were assessed. Logistic multilevel analysis was used to assess bivariate and multivariable  
38 relationships of place-based factors to the odds of homelessness. Random intercepts  
39 were included for ZIP codes, counties, and MSAs. Multivariable analysis assessed the  
40 relationships of place-based factors significant ( $p < 0.05$ ) in bivariate analysis to the  
41 outcome, controlling for individual-level confounders, and ZIP code-level economic  
42 deprivation and county-level housing affordability. Based on prior research,  
43 gentrification was conceptualized as reducing economic deprivation, housing  
44 affordability, and inadequate housing. Gentrification was also hypothesized as increasing  
45 law enforcement practices that would increase the arrest of PWID and thereby increase  
46 the odds of homelessness. Thus if gentrification was significantly associated with  
47 homelessness, two multivariable analyses were conducted: one that included these  
48 potential mediators in analyses and one that did not. We also explored whether the  
49 relationships of place-based factors to homelessness differed among Latino, black, and  
50 white participants through stratified analysis.

## 51 **Results**

### 52 *Place characteristics*

1 Approximately 50% of participants resided in counties where there was at least 87%  
2 (25<sup>th</sup> and 75<sup>th</sup> percentiles: 80.06, 90.32) unaffordable rental units among low-income  
3 households and the average number of months that applicants were on waiting lists for  
4 assisted housing was 26 months (25<sup>th</sup> and 75<sup>th</sup> percentiles: 21, 38). Across ZIP codes  
5 where participants resided, the median inadequate housing score was 1.95 (25<sup>th</sup> and  
6 75<sup>th</sup> percentiles: 1.53, 2.43). Specifically, on average, 2.25 percent of housing units  
7 lacked plumbing and 3.81 percent of housing units lacked kitchen facilities in ZIP codes  
8 that scored above the 50<sup>th</sup> percentile. The median gentrification score was 0.10 (25<sup>th</sup> and  
9 75<sup>th</sup> percentiles: -0.45, 0.95) among the ZIP codes where participants lived. On average,  
10 ZIP codes that scored above the median were characterized by a 53% increase in percent  
11 of non-Hispanic white residents between 1990 and 2009, and a 20% increase in median  
12 gross rent and median household income (adjusted for inflation) between 1990 and  
13 2009.

### 14 *Participant characteristics*

15  
16  
17  
18 The majority of participants were black (52%) and male (72%). The median age of  
19 participants was 48 years (25<sup>th</sup> and 75<sup>th</sup> percentiles: 39, 54). Less than 5% of participants  
20 reported current full-time employment at the time of the interview and 61% earned an  
21 annual personal income of \$5,000 USD or less. Sixty percent of participants reported  
22 experiencing homelessness at some point during the last year.

### 23 *Associations of place characteristics with homelessness among PWID*

24  
25  
26 In bivariate analysis (Table 3), PWID who lived in ZIP codes with higher levels of  
27 gentrification or inadequate housing had higher odds of homelessness in the past year  
28 (gentrification: Odds ratio (OR) =1.13 (95% Confidence Interval (CI) = 1.07, 1.18);  
29 inadequate housing: OR =1.13 (95% CI= 1.05, 1.22)).

30  
31 Because economic deprivation, percent unaffordable rental units among low-income  
32 households and inadequate housing were hypothesized to mediate the relationship of  
33 gentrification to homelessness, two multivariable models were analyzed. Multivariable  
34 analysis would not converge when incarceration was included in the model. Thus it was  
35 excluded from multivariable analysis. The first multivariable model included  
36 gentrification; the second model included gentrification, economic deprivation,  
37 inadequate housing and percent unaffordable rental units among low-income  
38 households. In the first multivariable model, gentrification remained significantly  
39 associated with homelessness (AOR =1.12 (95% CI=1.06, 1.17)). The addition of  
40 economic deprivation, percent unaffordable rental units among low-income households,  
41 and inadequate housing to the multivariable model did not substantively alter the  
42 relationship between gentrification and the odds of homelessness (Table 3: AOR=1.10  
43 (95% CI= 1.04, 1.15). Specifically, the odds of homelessness increased by 14% with each  
44 standard deviation increase in ZIP code-level gentrification. Inadequate housing also  
45 remained significantly associated with homelessness in multivariable analysis (Model 1:  
46 AOR=1.12 (95% CI=1.04, 1.20)). The odds of homelessness increased by 17% with each  
47 standard deviation increase in ZIP code-level inadequate housing. These associations did  
48 not differ in magnitude and significance across different racial/ethnic groups (data not  
49 shown). ZIP code-level economic deprivation and percent household crowding were not  
50 significantly associated with homelessness.

### 51 **Discussion**

52  
53  
54  
55 A high level of homelessness (60% in last year) was reported among this large sample of  
56 people who inject drugs, which not only highlights PWID's vulnerability to poor health  
57



1 outcomes but also raises concerns about the potential high societal costs that may result,  
2 including increased health care costs.<sup>49</sup> To our knowledge this is among the first studies  
3 to empirically reveal relationships of local economic and housing stock characteristics to  
4 homelessness among people who inject drugs. Specifically, this study discovered  
5 significant associations of ZIP code-level gentrification from 1990-2009 and current  
6 inadequate housing with homelessness among PWID; these relationships did not seem  
7 to vary across racial/ethnic groups. Because empirical investigations of the potential role  
8 of local economic and housing conditions to homelessness among the general population  
9 have been limited,<sup>32</sup> this paper also makes a new contribution to the larger body of  
10 research focused on homelessness and health.  
11

12 This relationship between gentrification and homelessness is supported by prior  
13 qualitative studies with predominantly low-income and racial/ethnic minority residents,  
14 which suggests that living in gentrifying areas can increase housing instability.<sup>31,36,40-43</sup>  
15 These studies report a combination of pathways through which gentrification can  
16 increase housing instability. Gentrification is a change in the socioeconomic character of  
17 a community that is largely accompanied by stark inflations of rental costs and property  
18 taxes.<sup>36,40,41</sup> Housing markets of gentrifying areas may further be changed by direct  
19 demolition or repurposing of low-income and affordable housing units and shelters into  
20 mixed-income and mix-used development<sup>31,35,36,40-43,50,51</sup>, a process that was widely  
21 implemented by federally-funded public housing demolitions in several US cities over  
22 the past two decades (e.g., Housing Opportunities for People Everywhere).<sup>31,52</sup>  
23

24  
25 Abrupt changes to the housing market in these ways can increase demand for affordable  
26 housing, shelters, and other safety-net services among low-to-moderate income  
27 residents who cannot afford inflated costs of living in gentrifying areas. As a result, the  
28 needs of the most marginalized and low-income groups, including PWID, may go  
29 unmet.<sup>31,44,50,51</sup> This is particularly concerning, given increasing rates of gentrification in  
30 several cities across the United States,<sup>53</sup> including those sampled in this study.  
31

32 Contrary to prior conceptual frameworks and hypotheses, we did not observe a  
33 statistically significant association between unaffordable housing and homelessness in  
34 this study. These findings, however, may not challenge the importance of increasing  
35 access to affordable housing, and the potential positive health consequences that may  
36 result. Because the US Census Bureau's ACS does not provide publicly available data on  
37 households spending greater than 35% or more of their income on housing, we could not  
38 explore the potential impact of a higher threshold of affordability. Higher thresholds of  
39 50% or more of income allocated to housing costs have been proposed by housing policy  
40 researchers to better measure the burden of housing-related costs among predominantly  
41 low-income populations.<sup>54</sup>  
42

43 It is plausible that factors not measured in this study may partly contribute to the  
44 relationship between gentrification and homelessness. Prior research demonstrates that  
45 gentrification and its common antecedent- urban redevelopment- are associated with  
46 reductions in crime.<sup>36,55</sup> These reductions may result from increases in law enforcement  
47 strategies that aim to prevent drug-related offenses and other "public nuisances" that  
48 might slow redevelopment and gentrification processes.<sup>35-37,44</sup> Perceived crime, and  
49 political capital among new residents may further increase law enforcement activities in  
50 gentrifying areas. Prior studies suggest that (more affluent) residents moving into  
51 gentrifying areas often have greater political power than (predominately low-income and  
52 racial/ethnic minority) long term residents and are thereby more empowered in  
53 advocating for increased law enforcement.<sup>56-58</sup> Together these circumstances can  
54 increase arrests of people who possess and use substances, including PWID, and thereby  
55 increase their vulnerability to homelessness.<sup>8,59</sup> Although we could not evaluate these  
56  
57  
58  
59

1 pathways in the current study, analysis demonstrated an association between self-  
2 reported arrests and homelessness, and post-hoc analysis demonstrated a moderate  
3 relationship between living in gentrifying ZIP codes and self-reported arrests among  
4 PWID in this study (OR= 1.04; CI= 1.00, 1.08).  
5

6 The association of ZIP-code level inadequate housing to homelessness in this study is  
7 supported by prior theories that describe inadequate housing as the “last resort” for low-  
8 income residents who may subsequently seek space in shelters or other precarious  
9 settings that offer basic amenities.<sup>33</sup>  
10

11 Inadequate housing can also predispose residents to eviction because inadequate  
12 housing units may lack consistent maintenance and may therefore be condemned by city  
13 agencies.<sup>60</sup> Substandard housing is also more likely to face abandonment and  
14 foreclosure, processes that increase housing instability among tenants.<sup>32,61</sup> Future  
15 longitudinal studies should explore these possibilities and the other suggested pathways  
16 through which inadequate housing and gentrification influence homelessness among  
17 PWID.  
18

### 19 Limitations

20  
21 This study is cross-sectional, so temporal associations that might be observed in  
22 longitudinal analysis may go undetected, and causal interpretations cannot be made. For  
23 example, the relationship of inadequate housing and homelessness may be bidirectional:  
24 inadequate housing increases homelessness among PWID, and homeless PWID may be  
25 more likely to seek housing in areas where inadequate housing is prevalent.  
26  
27

28 The cross-sectional design also limits exploration of potential displacement of homeless  
29 participants as a result of gentrification--prior studies have revealed links between  
30 gentrification, crime reduction efforts and the displacement of homeless persons and  
31 homeless services.<sup>34,35</sup> Additionally, findings may not be generalizable to PWID living  
32 outside of the MSAs captured by NHBS.  
33

34 We did not account for clustering of observations within RDS chains because of the high  
35 number of intercepts required for cross-classified multilevel modelling. We adjusted for  
36 place and socio-demographic factors, however, which may have partially controlled for  
37 intra-chain clustering.<sup>62,63</sup> Additionally, we could not distinguish different types or  
38 durations of homelessness among participants in this study because these data are not  
39 collected by NHBS. Additionally, because we lacked data on specific policing strategies,  
40 we could not determine whether law enforcement increased and mediated the  
41 relationship of gentrification to homelessness.  
42

43 Lastly, ZIP codes were the smallest geographic unit used to describe areas where  
44 participants resided. ZIP codes may not adequately capture smaller boundaries within  
45 which housing and economic factors are most relevant to housing stability among PWID.  
46  
47

### 48 Conclusion

49  
50 Homelessness has been associated with the transmission of HIV/AIDS and HCV, and  
51 with lower levels of drug cessation among PWID, and with high societal costs.  
52 Identifying place-level predictors of homelessness can suggest changes in policy that can  
53 prevent these negative consequences. This study demonstrated relationships of current  
54 inadequate housing and gentrification from 1990-2009 to homelessness among PWID.  
55 Future longitudinal studies should explore whether these associations are causal, and  
56 identify potential mediators. Because this area of research has been underexplored  
57  
58  
59  
60

1 among the general population, future research should encompass the general  
2 population. Growth in this line of research can inform urban planning strategies and  
3 community mobilization campaigns designed to curb potential negative effects of  
4 gentrification and improve access to adequate housing among low-income and  
5 marginalized populations.  
6  
7  
8  
9  
10  
11  
12  
13  
14  
15  
16  
17  
18  
19  
20  
21  
22  
23  
24  
25  
26  
27  
28  
29  
30  
31  
32  
33  
34  
35  
36  
37  
38  
39  
40  
41  
42  
43  
44  
45  
46  
47  
48  
49  
50  
51  
52  
53  
54  
55  
56  
57  
58  
59  
60

For peer review only

## Acknowledgements

We thank the Centers and Disease Control and Prevention, and the National HIV Behavioral Surveillance System Study Group: Atlanta, GA: Jennifer Taussig, Shacara Johnson, Jeff Todd; Baltimore, MD: Colin Flynn, Danielle German; Boston, MA: Debbie Isenberg, Maura Driscoll, Elizabeth Hurwitz; Chicago, IL: Nikhil Prachand, Nanette Benbow; Dallas, TX: Sharon Melville, Richard Yeager, Jim Dyer, Alicia Novoa; Denver, CO: Mark Thrun, Alia Al-Tayyib; Detroit, MI: Emily Higgins, Eve Mokotoff, Vivian Griffin; Houston, TX: Aaron Sayegh, Jan Risser, Hafeez Rehman; Los Angeles, CA: Trista Bingham, Ekow Kwa Sey; Miami, FL: Lisa Metsch, David Forrest, Dano Beck, Gabriel Cardenas; Nassau-Suffolk, NY: Chris Nemeth, Lou Smith, Carol-Ann Watson; New Orleans, LA: William T. Robinson, DeAnn Gruber, Narquis Barak; New York City, NY: Alan Neaigus, Samuel Jenness, Travis Wendel, Camila Gelpi-Acosta, Holly Hagan; Newark, NJ: Henry Godette, Barbara Bolden, Sally D'Errico; Philadelphia, PA: Kathleen A. Brady, Althea Kirkland, Mark Shpaner; San Diego, CA: Vanessa Miguelino-Keasling, Al Velasco; San Francisco, CA: H. Fisher Raymond; San Juan, PR: Sandra Miranda De Leo'n, Yadira Rolo'n-Colo'n; Seattle, WA: Maria Courogen, Hanne Thiede, Richard Burt; St Louis, MO: Michael Herbert, Yelena Friedberg, Dale Wrigley, Jacob Fisher; Washington, DC: Marie Sansone, Tiffany West-Ojo, Manya Magnus, Irene Kuo; Behavioral Surveillance Team

We also thank the men and women who participated in NHBS and the staff at all NHBS sites.

Note: The findings and conclusions in this report are those of the authors and do not necessarily represent the views of the Centers for Disease Control and Prevention

## Contributorship statement

S. L. Linton conceptualized, designed, and conducted the analysis. S. L. Linton constructed and compiled place-level data and interpreted the analysis and results. M. E. Kelley provided input on the analytic plan. M. E. Kelley, C. C. Karnes, Z. Ross, and M. E. Wolfe contributed to interpreting the geographical data, and S. Semaan, E. DiNenno, C. Sionean, C. Wejnert, and G. Paz-Bailey planned, designed, and oversaw data collection for NHBS. All authors contributed to revising the article and approved the final version of the article.

## Competing interests

No competing interests to report

## Funding

This research was supported by two grants from the National Institutes of Health: "Place Characteristics & Disparities in HIV in IDUS: A Multilevel Analysis of NHBS" (R01 DA035101; Cooper, PI) and the Emory Center for AIDS Research (P30 AI050409; Curran, PI).

## Data sharing statement

1 No additional data available  
2  
3  
4  
5  
6  
7  
8  
9  
10  
11  
12  
13  
14  
15  
16  
17  
18  
19  
20  
21  
22  
23  
24  
25  
26  
27  
28  
29  
30  
31  
32  
33  
34  
35  
36  
37  
38  
39  
40  
41  
42  
43  
44  
45  
46  
47  
48  
49  
50  
51  
52  
53  
54  
55  
56  
57  
58  
59  
60

For peer review only

## References

1. Secretary's Advisory Committee on Health Promotion and Disease Prevention Objectives for 2020. Healthy People 2020: An Opportunity to Address the Societal Determinants of Health in the United States. . July 26, 2010. (Accessed April 14, 2016, at <http://www.healthypeople.gov/2010/hp2020/advisory/SocietalDeterminantsHealth.htm>.)
2. Housing: Shared interests in health and Development. Social Determinants of Health Sectoral Briefing Series 1. . Geneva, Switzerland: World Health Organization.
3. Aidala AA, Sumartojo E. Why Housing? AIDS behav 2007;11:1-6.
4. U.S. Department of Housing and Urban Development. (Accessed April 14, 2016, at [http://portal.hud.gov/hudportal/HUD?src=/program\\_offices/comm\\_planning/aidshousing](http://portal.hud.gov/hudportal/HUD?src=/program_offices/comm_planning/aidshousing).)
5. The 2014 Annual Homeless Assessment Report (AHAR) to Congress. . Washington, DC: U.S. Department of Housing and Urban Development; 2014.
6. Mizuno Y, Purcell D, Borkowski TM, Knight K. The life priorities of HIV-seropositive injection drug users: findings from a community-based sample. AIDS Behav 2003;7:395-403.
7. Aidala AA, Lee G, Abramson DM, Messeri P, Siegler A. Housing need, housing assistance, and connection to HIV medical care. AIDS Behav 2007;11:101-15.
8. Linton SL, Celentano DD, Kirk GD, Mehta SH. The longitudinal association between homelessness, injection drug use, and injection-related risk behavior among persons with a history of injection drug use in Baltimore, MD. Drug Alcohol Depend 2013;132:457-65.
9. Song JY, Safaeian M, Strathdee SA, Vlahov D, Celentano DD. The prevalence of homelessness among injection drug users with and without HIV infection. J Urban Health 2000;77:678-87.
10. DeBeck K, Small W, Wood E, Li K, Montaner J, Kerr T. Public injecting among a cohort of injecting drug users in Vancouver, Canada. J Epidemiol Community Health 2009;63:81-6.
11. Krusi A, Fast D, Small W, Wood E, Kerr T. Social and structural barriers to housing among street-involved youth who use illicit drugs. Health Soc Care Community 2010;18:282-8.
12. Palepu A, Marshall BDL, Lai C, Wood E, Kerr T. Addiction treatment and stable housing among a cohort of injection drug users. PLoS One 2010;5:e11697.
13. Kim C, Kerr T, Li K, et al. Unstable housing and hepatitis C incidence among injection drug users in a Canadian setting. BMC Public Health 2009;9:270.
14. Bluthenthal RN, Do DP, Finch B, Martinez A, Edlin BR, Kral AH. Community characteristics associated with HIV risk among injection drug users in the San Francisco Bay Area: a multilevel analysis. J Urban Health 2007;84:653-66.
15. Shah NG, Galai N, Celentano DD, Vlahov D, Strathdee SA. Longitudinal predictors of injection cessation and subsequent relapse among a cohort of injection drug users in Baltimore, MD, 1988-2000. Drug Alcohol Depend 2006;83:147-56.
16. Mehta SH, Sudarshi D, Srikrishnan AK, et al. Factors associated with injection cessation, relapse and initiation in a community-based cohort of injection drug users in Chennai, India. Addiction 2012;107:349-58.
17. Aidala A, Cross JE, Stall R, Harre D, Sumartojo E. Housing status and HIV risk behaviors: implications for prevention and policy. AIDS behav 2005;9:251-65.

- 1 18. Dickson-Gomez J, Hilario H, Convey M, Corbett AM, Weeks M, Martinez M.  
2 The relationship between housing status and HIV risk among active drug users: a  
3 qualitative analysis. *Subst Use Misuse* 2009;44:139-62.
- 4 19. Bourgois P. The moral economies of homeless heroin addicts: confronting  
5 ethnography, HIV risk, and everyday violence in San Francisco shooting encampments.  
6 *Subst Use Misuse* 1998;33:2323-51.
- 7 20. Rhodes T, Singer M, Bourgois P, Friedman SR, Strathdee SA. The social  
8 structural production of HIV risk among injecting drug users. *Soc Sci Med*  
9 2005;61:1026-44.
- 10 21. Sherman SG, Cheng Y, Kral AH. Prevalence and correlates of opiate overdose  
11 among young injection drug users in a large U.S. city. *Drug Alcohol Depend*  
12 2007;88:182-7.
- 13 22. Shah NG, Celentano DD, Vlahov D, et al. Correlates of enrollment in methadone  
14 maintenance treatment programs differ by HIV-serostatus. *Aids* 2000;14:2035-43.
- 15 23. Appel PW, Ellison AA, Jansky HK, Oldak R. Barriers to enrollment in drug abuse  
16 treatment and suggestions for reducing them: opinions of drug injecting street outreach  
17 clients and other system stakeholders. *Am J Drug Alcohol Abuse* 2004;30:129-53.
- 18 24. Havens JR, Latkin CA, Pu M, et al. Predictors of opiate agonist treatment  
19 retention among injection drug users referred from a needle exchange program. *J Subst*  
20 *Abuse Treat* 2009;36:306-12.
- 21 25. Genberg BL, Gange SJ, Go VF, et al. The effect of neighborhood deprivation and  
22 residential relocation on long-term injection cessation among injection drug users (IDUs)  
23 in Baltimore, Maryland. *Addiction* 2011;106:1966-74.
- 24 26. Berg KM, Demas PA, Howard AA, Schoenbaum EE, Gourevitch MN, Arnsten  
25 JH. Gender differences in factors associated with adherence to antiretroviral therapy. *J*  
26 *Gen Intern Med* 2004;19:1111-7.
- 27 27. Appel PW, Tsemberis S, Joseph H, Stefancic A, Lambert-Wacey D. Housing First  
28 for severely mentally ill homeless methadone patients. *J Addict Dis* 2012;31:270-7.
- 29 28. Hawk M, Davis D. The effects of a harm reduction housing program on the viral  
30 loads of homeless individuals living with HIV/AIDS. *AIDS Care* 2012;24:577-82.
- 31 29. Davey-Rothwell MA, Latimore A, Hulbert A, Latkin CA. Sexual networks and  
32 housing stability. *Journal of Urban Health* 2011;88:759-66.
- 33 30. Mizuno Y, Purcell DW, Zhang J, et al. Predictors of current housing status among  
34 HIV-seropositive injection drug users (IDUs): results from a 1-year study. *AIDS behav*  
35 2008;13:165-72.
- 36 31. Kasinitz P. Gentrification and homelessness: The single room occupant and the  
37 inner city revival. *The Urban And Social Change Review* 1984;17:9-14.
- 38 32. Culhane DP, Chang-Moo L, Wachter SM. Where the homeless come from: a  
39 study of the prior address distribution of families  
40 admitted to public shelters in New York City and Philadelphia. *Housing Policy Debate*  
41 1996;7:327-65.
- 42 33. Carter G. From exclusion to destitution: race, affordable housing, and  
43 homelessness. *Cityscape: A Journal of Policy Development and Research* 2011;13:33-  
44 70.
- 45 34. Johnson RA. African Americans and homelessness moving through history. *J*  
46 *Black Stud* 2010;40:583-605.

- 1 35. Reese E, Deverteuil G, Thach L. 'Weak-Center' gentrification and the  
2 contradictions of containment: deconcentrating poverty in downtown Los Angeles.  
3 *International Journal of Urban and Regional Research* 2010;34:310-27.
- 4 36. Linton SL, Kennedy CE, Latkin CA, Celentano DD, Kirk GD, Mehta SH.  
5 "Everything that looks good ain't good!": Perspectives on urban redevelopment among  
6 persons with a history of injection drug use in Baltimore, Maryland. *Int J Drug Policy*  
7 2013;24:605-13.
- 8 37. Curtis R. "Crack, Cocaine and Heroin: Drug Eras in Williamsburg, Brooklyn,  
9 1960-2000". *Addiction Research & Theory* 2003;11:47-63.
- 10 38. Gomez MB. Race, class, power, and organizing in East Baltimore : rebuilding  
11 abandoned communities in America. Lanham, MD: Lexington Books; 2013.
- 12 39. Gomez MB, Muntaner C. Urban redevelopment and neighborhood health in East  
13 Baltimore, Maryland: The role of communitarian and institutional social capital. *Critical*  
14 *Public Health* 2005;15:83-102.
- 15 40. Freeman L, Braconi F. Gentrification and displacement - New York City in the  
16 1990s. *Journal of the American Planning Association* 2004;70:39-52.
- 17 41. Davila A. Dreams of place: Housing, gentrification, and the marketing of space in  
18 El Barrio. *Centro Journal* 2003;15:112-37.
- 19 42. Marcuse P. Gentrification, abandonment, and displacement:connections, causes,  
20 and policy responses in New York City. *Journal of Urban and Contemporary Law*  
21 1985;28:195-240.
- 22 43. Fullilove MT. Root shock: how tearing up city neighborhoods hurts American and  
23 what we can do about it. First Edition ed. New York, NY: The Random House Publishing  
24 Group; 2004.
- 25 44. Whittle HJ, Palar K, Hufstedler LL, Seligman HK, Frongillo EA, Weiser SD.  
26 Food insecurity, chronic illness, and gentrification in the San Francisco Bay Area: An  
27 example of structural violence in United States public policy. *Soc Sci Med*  
28 2015;143:154-61.
- 29 45. Gallagher KM, Sullivan PS, Lansky A, Onorato IM. Behavioral surveillance  
30 among people at risk for HIV infection in the U.S.: the National HIV Behavioral  
31 Surveillance System. *Public Health Rep* 2007;122 Suppl 1:32-8.
- 32 46. CDC. HIV/AIDS Surveillance Report, 2006. Atlanta: U.S. Department of Health  
33 and Human Services, Centers for Disease Control and Prevention; 2008.
- 34 47. OMB. Provisional guidance on the implementation of the 1997 standards for  
35 federal data on race and ethnicity, Executive Office of the President, December 15. : U.S.  
36 Office of Management and Budget; 2000.
- 37 48. American Community Survey and Puerto Rico Community Survey: 2011 Subject  
38 Definitions. Washington, DC: United States Census Bureau; 2011.
- 39 49. Sturtevant L, Viveiros J. How investing in housing can save on health care: a  
40 research review and comment on future directions for integrating housing and health  
41 services. Washington, DC: Center for Housing Policy, National Housing Conference;  
42 2016.
- 43 50. Vitale AS. The Safer Cities Initiative and the removal of the homeless.  
44 *Criminology & Public Policy* 2010;9:867-73.
- 45 51. Culhane DP. Tackling homelessness in Los Angeles' Skid Row. *Criminology &*  
46 *Public Policy* 2010;9:851-7.



- 1 52. Popkin S, Katz B, Cunningham K, Brown J, Gustafson M, Turner A. A decade of  
2 HOPE VI: research findings and policy challenges Washington, DC: The Urban Institute;  
3 2004.
- 4 53. Hartley D. Gentrification and financial health. Cleveland, OH: Federal Reserve  
5 Bank of Cleveland; 2013.
- 6 54. Belsky ES, Goodman J, Drew R. Measuring the nation's rental housing  
7 affordability problems. Cambridge, MA: Joint Center for Housing Studies; 2005.
- 8 55. Kreager DA, Lyons CJ, Hays ZR. Urban revitalization and Seattle crime, 1982–  
9 2000. *Social problems* 2011;58:615-39.
- 10 56. Hyra D. The back-to-the-city movement: Neighbourhood redevelopment and  
11 processes of political and cultural displacement. *Urban Studies* 2014;52:1753-73.
- 12 57. Freeman L. There goes the 'hood : views of gentrification from the ground up.  
13 Philadelphia, PA: Temple University Press; 2006.
- 14 58. Gibbs Knotts H, Haspel M. The impact of gentrification on voter turnout\*. *Social  
15 Science Quarterly* 2006;87:110-21.
- 16 59. Cheng T, Wood E, Feng C, et al. Transitions into and out of homelessness among  
17 street-involved youth in a Canadian setting. *Health & place* 2013;23:122-7.
- 18 60. Desmond M. Poor Black women are evicted at alarming rates, setting off a chain  
19 of hardship. Chicago, Illinois: MacArthur Foundation; 2014 March 2014.
- 20 61. Foreclosure to homelessness 2009: the forgotten victims of the subprime crisis.  
21 Washington, DC: National Coalition for the Homeless; 2009.
- 22 62. Abdul-Quader A, Heckathorn D, McKnight C, et al. Effectiveness of respondent-  
23 driven sampling for recruiting drug users in New York City: findings from a pilot study.  
24 *Journal of Urban Health* 2006;83:459-76.
- 25 63. Burt RD, Hagan H, Sabin K, Thiede H. Evaluating respondent-driven sampling in  
26 a major metropolitan area: comparing injection drug users in the 2005 Seattle area  
27 National HIV Behavioral Surveillance System survey with participants in the RAVEN  
28 and Kiwi Studies. *Annals of Epidemiology* 2010;20:159-67.
- 29  
30  
31  
32  
33  
34  
35  
36  
37  
38  
39  
40  
41  
42  
43  
44  
45  
46  
47  
48  
49  
50  
51  
52  
53  
54  
55  
56  
57  
58  
59  
60

**Table 1. Definition and sources of place-based exposures**

| <b>Place characteristic</b>                                                         | <b>Measure</b>                                                                                                                                                                                                                                                                                                               | <b>Source</b>                                                                      |
|-------------------------------------------------------------------------------------|------------------------------------------------------------------------------------------------------------------------------------------------------------------------------------------------------------------------------------------------------------------------------------------------------------------------------|------------------------------------------------------------------------------------|
| <b>County</b>                                                                       |                                                                                                                                                                                                                                                                                                                              |                                                                                    |
| Percent unaffordable rental units among low-income households                       | Among households earning <\$10,000 USD annually, the number of occupied rental units where residents spent $\geq 35\%$ of their annual household income on rent, divided by the total number of households earning household income less than \$10,000                                                                       | 2007-2011 American Community Survey                                                |
| Average number of months that applicants were on waiting lists for assisted housing | Average months on waiting list among new admissions for Department of Housing and Urban Development assisted housing programs                                                                                                                                                                                                | 2009 Picture of Subsidized Households, Department of Housing and Urban Development |
| <b>ZIP code</b>                                                                     |                                                                                                                                                                                                                                                                                                                              |                                                                                    |
| Percent household crowding                                                          | Percent of occupied housing units with >1.5 people per room                                                                                                                                                                                                                                                                  | 2007-2011 American Community Survey                                                |
| Inadequate housing                                                                  | An index was created by summing the square root of the percent of housing without plumbing and the square root of the percent of housing without kitchen facilities                                                                                                                                                          | 2007-2011 American Community Survey                                                |
| Economic deprivation <sup>1</sup>                                                   | Index of % residents employed in low-wage occupations (e.g. service, sales, construction, manufacturing, transportation), % households in poverty, % female-headed households with dependent children <18 years, % households on public assistance, % low-income households, % without high school diploma/GED, % unemployed | 2007-2011 American Community Survey                                                |

<sup>1</sup> The economic deprivation index was informed by: Messer L, Laraia B, Kaufman J, et al. The development of a standardized neighborhood deprivation index. *J Urban Health* 2006;83:1041-62; Krieger N, Barbeau EM, Soobader M-J. Class matters: U.S. versus U.K. measures of occupational disparities in access to health services and health status in the 2000 U.S. National Health Interview Survey. *International Journal of Health Services* 2005;35:213-36. Principle components analysis (PCA) was conducted to confirm the dimensionality of the items across ZIP codes of all MSAs. Once confirmed through PCA, items were standardized by z-score, weighted by factor loadings, and summed to create the index.

|                             |                                                                                                                                                                                                                                                                           |                                                                                  |
|-----------------------------|---------------------------------------------------------------------------------------------------------------------------------------------------------------------------------------------------------------------------------------------------------------------------|----------------------------------------------------------------------------------|
| Gentrification <sup>2</sup> | Index of percent change in the following indicators between 1990 and 2009: % poverty, % college or more among adults aged $\geq 25$ , % White, median household income, median monthly rent. Economic factors were adjusted for inflation using the Consumer Price Index. | Geolytics 1990 Long Form in 2010 Boundaries; 2007-2011 American Community Survey |
|-----------------------------|---------------------------------------------------------------------------------------------------------------------------------------------------------------------------------------------------------------------------------------------------------------------------|----------------------------------------------------------------------------------|

**Table 2. Distributions of ZIP code, county, and participant characteristics among 8,992 people who inject drugs living in 19 US metro areas in 2009**

| Characteristics                                                                     | Total<br>N (%)<br>or Median (25 <sup>th</sup> , 75 <sup>th</sup> ) |
|-------------------------------------------------------------------------------------|--------------------------------------------------------------------|
|                                                                                     | N= 8,992                                                           |
| <b>Region</b>                                                                       |                                                                    |
| Northeast                                                                           | 2,122 (23.55)                                                      |
| South                                                                               | 3,605 (40.01)                                                      |
| Midwest                                                                             | 938 (10.41)                                                        |
| West                                                                                | 2,345 (26.03)                                                      |
| <b>MSA (N=19)</b>                                                                   |                                                                    |
| <b>County (N=51)</b>                                                                |                                                                    |
| Percent unaffordable rental units among low-income households                       | 86.57 (80.06, 90.32)                                               |
| Average number of months that applicants were on waiting lists for assisted housing | 26 (21, 38)                                                        |
| <b>ZIP code (N=939)</b>                                                             |                                                                    |
| Percent household crowding                                                          | 1.5 (0.8, 2.8)                                                     |
| Inadequate housing                                                                  | 1.95 (1.53, 2.43)                                                  |
| Economic deprivation                                                                | 2.26 (0.67, 3.87)                                                  |
| Gentrification                                                                      | 0.10 (-0.45, 0.95)                                                 |
| <b>Participant characteristics</b>                                                  |                                                                    |
| Current age                                                                         | 48 (39, 54)                                                        |
| Male                                                                                | 6,450 (71.73)                                                      |
| Race/ethnicity                                                                      |                                                                    |
| Latino                                                                              | 1,622 (18.04)                                                      |
| Black                                                                               | 4,662 (51.85)                                                      |
| White                                                                               | 2,708 (30.12)                                                      |
| Annual income ( $\leq 5000$ USD)                                                    | 5,488 (61.03)                                                      |
| Full-time employment                                                                | 394 (4.38)                                                         |
| Incarceration                                                                       | 3,281 (36.50)                                                      |
| Homelessness                                                                        | 5,394 (59.99)                                                      |
| Daily injection                                                                     | 2,310 (25.69)                                                      |
| Binge drinking                                                                      | 4,939 (54.93)                                                      |

<sup>2</sup> The gentrification measure was informed by: Freeman L, Braconi F. Gentrification and displacement - New York City in the 1990s. *Journal of the American Planning Association* 2004;70:39-52.; Marcuse P. Gentrification, Abandonment, and Displacement: Connections, Causes, and Policy Responses in New York City. *Journal of Urban and Contemporary Law* 1985;28: 195-240.; Huynh M, Maroko AR. Gentrification and Preterm Birth in New York City, 2008-2010. *J Urban Health* 2013. Principle components analysis (PCA) was conducted to confirm the dimensionality of the items across ZIP codes of all MSAs. Once confirmed through PCA, items were standardized by z-score, weighted by factor loadings, and summed to create the index.

|                                              |               |
|----------------------------------------------|---------------|
| Type of sexual partner in the past 12 months |               |
| Main                                         | 4,454 (49.53) |
| Casual                                       | 4,370 (48.60) |
| Non-injection drug use                       | 6,765 (75.23) |
| Recent HIV test result                       |               |
| Negative result on most recent HIV test      | 6,986 (77.69) |
| Positive result on most recent HIV test      | 495 (5.50)    |

**Table 3. Association of ZIP code, county, and participant characteristics with recent homelessness among people who inject drugs from 19 US metro areas in 2009**

|                                                                                     | Odds ratio (95% Confidence interval) | Adjusted odds ratio (95% Confidence interval)* |
|-------------------------------------------------------------------------------------|--------------------------------------|------------------------------------------------|
| Intercept                                                                           |                                      | 19.58 (1.13, 339.80)                           |
| <b>Region</b>                                                                       |                                      |                                                |
| Northeast (Reference)                                                               | 1.00                                 |                                                |
| South                                                                               | 1.19 (0.73, 1.93)                    | --                                             |
| Midwest                                                                             | 0.71 (0.33, 1.55)                    | --                                             |
| West                                                                                | 1.33 (0.77, 2.28)                    | --                                             |
| <b>MSA (N=19)</b>                                                                   |                                      |                                                |
| Random intercept variance                                                           | 0.06 (0, 2.61)                       | 0.06 (0, 2.00)                                 |
| <b>County (N=51)</b>                                                                |                                      |                                                |
| Random intercept variance                                                           | 0.26 (0.10, 0.70)                    | 0.21 (0.07, 0.69)                              |
| Percent unaffordable rental units among low-income households                       | 0.97 (0.94, 1.01)                    | 0.99 (0.95, 1.02)                              |
| Average number of months that applicants were on waiting lists for assisted housing | 1.00 (0.98, 1.01)                    | --                                             |
| <b>ZIP code (N=937)</b>                                                             |                                      |                                                |
| Random intercept variance                                                           | 0.31 (0.23, 0.43)                    | 0.17 (0.11, 0.26)                              |
| Percent household crowding                                                          | 1.08 (0.96, 1.21)                    | --                                             |
| Inadequate housing                                                                  | 1.13 (1.05, 1.22)                    | 1.12 (1.04, 1.15)                              |
| Economic deprivation                                                                | 0.98 (0.95, 1.02)                    | 0.99 (0.96, 1.03)                              |
| Gentrification                                                                      | 1.13 (1.07, 1.18)                    | 1.10 (1.04, 1.15)                              |
| <b>Participant Characteristics</b>                                                  |                                      |                                                |
| Current age                                                                         | 0.97 (0.96, 0.97)                    | 0.97 (0.97, 0.98)                              |
| Sex (1=male)                                                                        | 0.88 (0.80, 0.98)                    | 0.77 (0.69, 0.85)                              |
| Race/ethnicity                                                                      |                                      |                                                |
| White (reference)                                                                   | 1.00                                 | 1.00                                           |
| Black                                                                               | 0.66 (0.58, 0.75)                    | 0.74 (0.65, 0.86)                              |
| Latino                                                                              | 0.87 (0.75, 1.01)                    | 0.81 (0.69, 0.95)                              |
| Annual income (5,000 USD vs. more)                                                  | 0.48 (0.44, 0.53)                    | 0.48 (0.44, 0.53)                              |
| Full-time employment                                                                | 0.34 (0.27, 0.42)                    | 0.38 (0.30, 0.48)                              |
| Incarceration                                                                       | 2.19 (1.98, 2.42)                    | --                                             |
| Daily injection (vs. less than daily)                                               | 0.81 (0.73, 0.91)                    | 0.83 (0.74, 0.93)                              |
| Binge drinking                                                                      | 1.51 (1.38, 1.66)                    | 1.33 (1.20, 1.47)                              |
| Non-injection drug use                                                              | 1.41 (1.27, 1.57)                    | 1.27 (1.13, 1.42)                              |

|                                                            |                   |                   |
|------------------------------------------------------------|-------------------|-------------------|
| Type of sexual partner in the past 12 months               |                   |                   |
| None                                                       | 1.00              | 1.00              |
| Main                                                       | 1.15 (0.82, 1.60) | 1.14 (0.81, 1.60) |
| Casual                                                     | 2.10 (1.91, 2.31) | 1.80 (1.63, 1.99) |
| Recent self-reported HIV test result                       |                   |                   |
| Indeterminate result/or did not receive result (reference) | 1.00              | 1.00              |
| Negative result                                            | 0.78 (0.69, 0.88) | 0.88 (0.77, 1.00) |
| Positive result                                            | 0.49 (0.39, 0.62) | 0.64 (0.50, 0.80) |

\* Multivariable analysis assessed the relationships of place-based factors significant ( $p < 0.05$ ) in bivariate analysis to the outcome, controlling for individual-level confounders, and ZIP code-level economic deprivation and county-level housing affordability. Because multivariate analysis did not converge with incarceration included in the model, it was removed from the model.

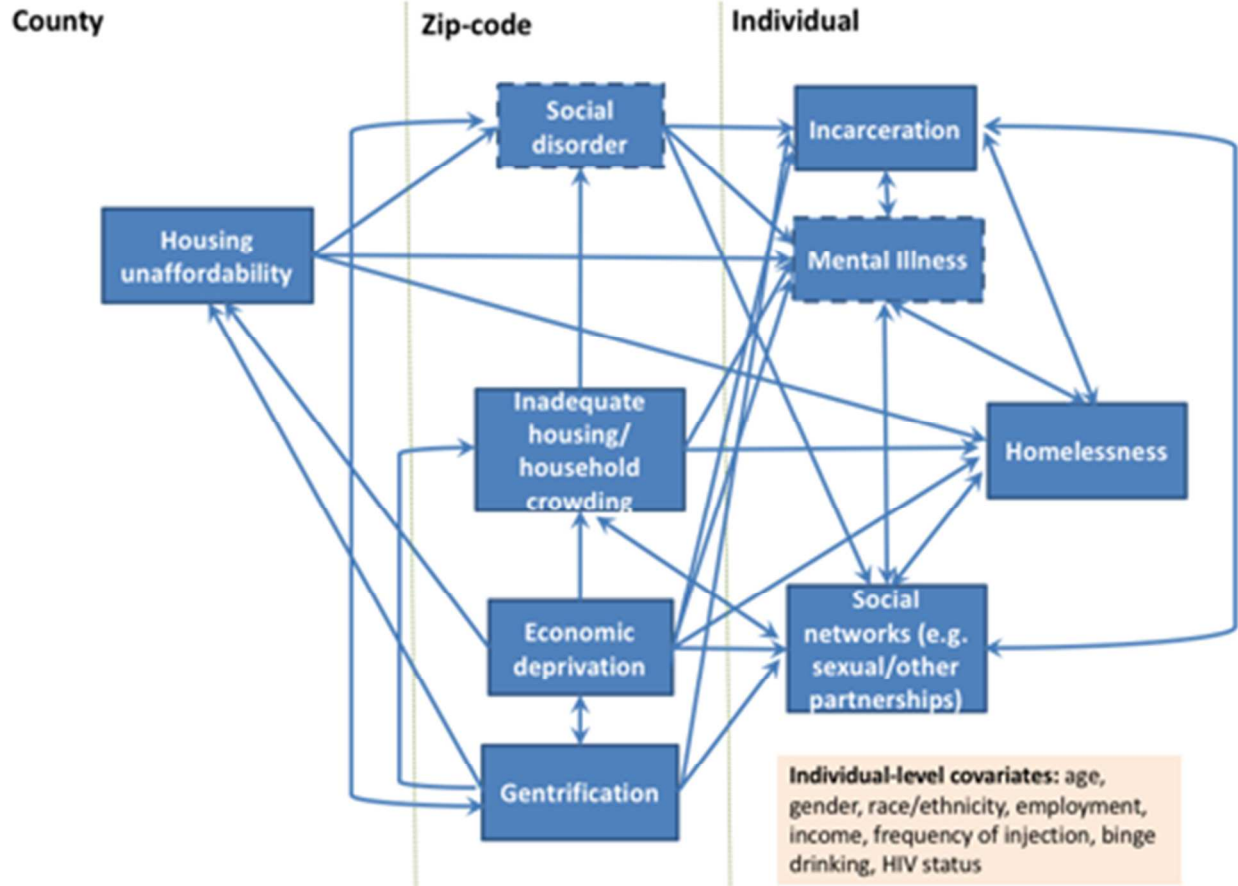

ew only

## STROBE Statement—checklist of items that should be included in reports of observational studies

|                              | Item No | Recommendation                                                                                                                                                                                                                                                                                                                                                                                                                                                                                                                                                                                                                                                                                              |
|------------------------------|---------|-------------------------------------------------------------------------------------------------------------------------------------------------------------------------------------------------------------------------------------------------------------------------------------------------------------------------------------------------------------------------------------------------------------------------------------------------------------------------------------------------------------------------------------------------------------------------------------------------------------------------------------------------------------------------------------------------------------|
| <b>Title and abstract</b>    | 1       | (a) Indicate the study's design with a commonly used term in the title or the abstract<br>Included in abstract on page 3<br><br>(b) Provide in the abstract an informative and balanced summary of what was done and what was found Page 3                                                                                                                                                                                                                                                                                                                                                                                                                                                                  |
| <b>Introduction</b>          |         |                                                                                                                                                                                                                                                                                                                                                                                                                                                                                                                                                                                                                                                                                                             |
| Background/rationale         | 2       | Explain the scientific background and rationale for the investigation being reported<br>Pages 4-5                                                                                                                                                                                                                                                                                                                                                                                                                                                                                                                                                                                                           |
| Objectives                   | 3       | State specific objectives, including any prespecified hypotheses Page 5                                                                                                                                                                                                                                                                                                                                                                                                                                                                                                                                                                                                                                     |
| <b>Methods</b>               |         |                                                                                                                                                                                                                                                                                                                                                                                                                                                                                                                                                                                                                                                                                                             |
| Study design                 | 4       | Present key elements of study design early in the paper Page 5                                                                                                                                                                                                                                                                                                                                                                                                                                                                                                                                                                                                                                              |
| Setting                      | 5       | Describe the setting, locations, and relevant dates, including periods of recruitment, exposure, follow-up, and data collection Page 5-6                                                                                                                                                                                                                                                                                                                                                                                                                                                                                                                                                                    |
| Participants                 | 6       | (a) <i>Cohort study</i> —Give the eligibility criteria, and the sources and methods of selection of participants. Describe methods of follow-up<br><i>Case-control study</i> —Give the eligibility criteria, and the sources and methods of case ascertainment and control selection. Give the rationale for the choice of cases and controls<br><i>Cross-sectional study</i> —Give the eligibility criteria, and the sources and methods of selection of participants Page 5<br><br>(b) <i>Cohort study</i> —For matched studies, give matching criteria and number of exposed and unexposed<br><i>Case-control study</i> —For matched studies, give matching criteria and the number of controls per case |
| Variables                    | 7       | Clearly define all outcomes, exposures, predictors, potential confounders, and effect modifiers. Give diagnostic criteria, if applicable Pages 5-6                                                                                                                                                                                                                                                                                                                                                                                                                                                                                                                                                          |
| Data sources/<br>measurement | 8*      | For each variable of interest, give sources of data and details of methods of assessment (measurement). Describe comparability of assessment methods if there is more than one group Pages 5-6, 17-18 in Table 1                                                                                                                                                                                                                                                                                                                                                                                                                                                                                            |
| Bias                         | 9       | Describe any efforts to address potential sources of bias Page 9                                                                                                                                                                                                                                                                                                                                                                                                                                                                                                                                                                                                                                            |
| Study size                   | 10      | Explain how the study size was arrived at Page 5                                                                                                                                                                                                                                                                                                                                                                                                                                                                                                                                                                                                                                                            |
| Quantitative variables       | 11      | Explain how quantitative variables were handled in the analyses. If applicable, describe which groupings were chosen and why Pages 5-6                                                                                                                                                                                                                                                                                                                                                                                                                                                                                                                                                                      |
| Statistical methods          | 12      | (a) Describe all statistical methods, including those used to control for confounding Page 6<br><br>(b) Describe any methods used to examine subgroups and interactions Page 6<br><br>(c) Explain how missing data were addressed Page 5<br><br>(d) <i>Cohort study</i> —If applicable, explain how loss to follow-up was addressed<br><i>Case-control study</i> —If applicable, explain how matching of cases and controls was addressed<br><i>Cross-sectional study</i> —If applicable, describe analytical methods taking account of sampling strategy Page 7<br><br>(e) Describe any sensitivity analyses N/A: None performed                                                                           |

1  
2  
3  
4  
5  
6  
7  
8  
9  
10  
11  
12  
13  
14  
15  
16  
17  
18  
19  
20  
21  
22  
23  
24  
25  
26  
27  
28  
29  
30  
31  
32  
33  
34  
35  
36  
37  
38  
39  
40  
41  
42  
43  
44  
45  
46  
47  
48  
49  
50  
51  
52  
53  
54  
55  
56  
57  
58  
59  
60

Continued on next page

For peer review only



**Results**

|                  |     |                                                                                                                                                                                                                                                                                                                                                                                                                                                                    |
|------------------|-----|--------------------------------------------------------------------------------------------------------------------------------------------------------------------------------------------------------------------------------------------------------------------------------------------------------------------------------------------------------------------------------------------------------------------------------------------------------------------|
| Participants     | 13* | (a) Report numbers of individuals at each stage of study—eg numbers potentially eligible, examined for eligibility, confirmed eligible, included in the study, completing follow-up, and analysed Page 5<br>(b) Give reasons for non-participation at each stage Page 5<br>(c) Consider use of a flow diagram Described in manuscript; no visual provided                                                                                                          |
| Descriptive data | 14* | (a) Give characteristics of study participants (eg demographic, clinical, social) and information on exposures and potential confounders Page 7, 18-19<br>(b) Indicate number of participants with missing data for each variable of interest Page 5<br>(c) <i>Cohort study</i> —Summarise follow-up time (eg, average and total amount)                                                                                                                           |
| Outcome data     | 15* | <i>Cohort study</i> —Report numbers of outcome events or summary measures over time<br><i>Case-control study</i> —Report numbers in each exposure category, or summary measures of exposure<br><i>Cross-sectional study</i> —Report numbers of outcome events or summary measures Page 7, 18-19                                                                                                                                                                    |
| Main results     | 16  | (a) Give unadjusted estimates and, if applicable, confounder-adjusted estimates and their precision (eg, 95% confidence interval). Make clear which confounders were adjusted for and why they were included Pages 6, 19-20<br>(b) Report category boundaries when continuous variables were categorized Page 6<br>(c) If relevant, consider translating estimates of relative risk into absolute risk for a meaningful time period N/A- no relative risk reported |
| Other analyses   | 17  | Report other analyses done—eg analyses of subgroups and interactions, and sensitivity analyses Pages 6, 8, and 10                                                                                                                                                                                                                                                                                                                                                  |

**Discussion**

|                  |    |                                                                                                                                                                                       |
|------------------|----|---------------------------------------------------------------------------------------------------------------------------------------------------------------------------------------|
| Key results      | 18 | Summarise key results with reference to study objectives Pages 7-10                                                                                                                   |
| Limitations      | 19 | Discuss limitations of the study, taking into account sources of potential bias or imprecision. Discuss both direction and magnitude of any potential bias Page 9                     |
| Interpretation   | 20 | Give a cautious overall interpretation of results considering objectives, limitations, multiplicity of analyses, results from similar studies, and other relevant evidence Pages 7-10 |
| Generalisability | 21 | Discuss the generalisability (external validity) of the study results Page 9                                                                                                          |

**Other information**

|         |    |                                                                                                                                                                       |
|---------|----|-----------------------------------------------------------------------------------------------------------------------------------------------------------------------|
| Funding | 22 | Give the source of funding and the role of the funders for the present study and, if applicable, for the original study on which the present article is based Page 11 |
|---------|----|-----------------------------------------------------------------------------------------------------------------------------------------------------------------------|

\*Give information separately for cases and controls in case-control studies and, if applicable, for exposed and unexposed groups in cohort and cross-sectional studies.

**Note:** An Explanation and Elaboration article discusses each checklist item and gives methodological background and published examples of transparent reporting. The STROBE checklist is best used in conjunction with this article (freely available on the Web sites of PLoS Medicine at <http://www.plosmedicine.org/>, Annals of Internal Medicine at <http://www.annals.org/>, and Epidemiology at <http://www.epidem.com/>). Information on the STROBE Initiative is available at [www.strobe-statement.org](http://www.strobe-statement.org).

# BMJ Open

## Cross-sectional association between ZIP code-level gentrification and homelessness among a large community-based sample of people who inject drugs in 19 US cities

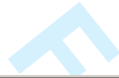

|                                 |                                                                                                                                                                                                                                                                                                                                                                                                                                                                                                                                                                                                                                                                                                                                                                                                                                                                                                                                                                                                                                                                                                                                                                                                            |
|---------------------------------|------------------------------------------------------------------------------------------------------------------------------------------------------------------------------------------------------------------------------------------------------------------------------------------------------------------------------------------------------------------------------------------------------------------------------------------------------------------------------------------------------------------------------------------------------------------------------------------------------------------------------------------------------------------------------------------------------------------------------------------------------------------------------------------------------------------------------------------------------------------------------------------------------------------------------------------------------------------------------------------------------------------------------------------------------------------------------------------------------------------------------------------------------------------------------------------------------------|
| Journal:                        | <i>BMJ Open</i>                                                                                                                                                                                                                                                                                                                                                                                                                                                                                                                                                                                                                                                                                                                                                                                                                                                                                                                                                                                                                                                                                                                                                                                            |
| Manuscript ID                   | bmjopen-2016-013823.R1                                                                                                                                                                                                                                                                                                                                                                                                                                                                                                                                                                                                                                                                                                                                                                                                                                                                                                                                                                                                                                                                                                                                                                                     |
| Article Type:                   | Research                                                                                                                                                                                                                                                                                                                                                                                                                                                                                                                                                                                                                                                                                                                                                                                                                                                                                                                                                                                                                                                                                                                                                                                                   |
| Date Submitted by the Author:   | 20-Mar-2017                                                                                                                                                                                                                                                                                                                                                                                                                                                                                                                                                                                                                                                                                                                                                                                                                                                                                                                                                                                                                                                                                                                                                                                                |
| Complete List of Authors:       | Linton, Sabriya; Emory University School of Public Health, Behavioral Sciences and Health Education<br>Cooper, Hannah; Emory University School of Public Health, Behavioral Sciences and Health Education<br>Kelley, Mary; Emory University, Department of Biostatistics and Bioinformatics<br>Karnes, Conny; Emory University School of Public Health, Behavioral Sciences and Health Education<br>Ross, Zev; ZevRoss Spatial Analysis,<br>Wolfe, Mary; Emory University School of Public Health, Behavioral Sciences and Health Education<br>Friedman, Sam; National Development and Research Institutes, Institute for Infectious Disease Research<br>Des Jarlais, Don; Mount Sinai Beth Israel, Baron Edmond de Rothschild Chemical Dependency Institute<br>Semaan, Salaam; Centers for Disease Control and Prevention<br>Tempalski, Barbara; National Development and Research Institutes , Institute for Infectious Disease Research<br>Sionean, Catlainn; Centers for Disease Control and Prevention<br>DiNenno, Elizabeth; Centers for Disease Control and Prevention<br>Wejnert, Cyprian; Centers for Disease Control and Prevention<br>Paz-Bailey, G; Centers for Disease Control and Prevention |
| <b>Primary Subject Heading</b>: | Public health                                                                                                                                                                                                                                                                                                                                                                                                                                                                                                                                                                                                                                                                                                                                                                                                                                                                                                                                                                                                                                                                                                                                                                                              |
| Secondary Subject Heading:      | Epidemiology, Addiction, HIV/AIDS                                                                                                                                                                                                                                                                                                                                                                                                                                                                                                                                                                                                                                                                                                                                                                                                                                                                                                                                                                                                                                                                                                                                                                          |
| Keywords:                       | PUBLIC HEALTH, EPIDEMIOLOGY, HIV & AIDS < INFECTIOUS DISEASES, Substance misuse < PSYCHIATRY                                                                                                                                                                                                                                                                                                                                                                                                                                                                                                                                                                                                                                                                                                                                                                                                                                                                                                                                                                                                                                                                                                               |
|                                 |                                                                                                                                                                                                                                                                                                                                                                                                                                                                                                                                                                                                                                                                                                                                                                                                                                                                                                                                                                                                                                                                                                                                                                                                            |

SCHOLARONE™  
Manuscripts

1 **Cross-sectional association between ZIP code-level gentrification and**  
2 **homelessness among a large community-based sample of people who inject**  
3 **drugs in 19 US cities**  
4

5  
6 Sabriya L. Linton,<sup>1</sup> Hannah L.F. Cooper,<sup>1</sup> Mary E. Kelley,<sup>1</sup> Conny C. Karnes,<sup>1</sup> Zev Ross,<sup>2</sup>  
7 Mary E Wolfe,<sup>1</sup> Samuel R. Friedman,<sup>3</sup> Don Des Jarlais,<sup>4</sup> Salaam Semaan,<sup>5</sup> Barbara  
8 Tempalski,<sup>3</sup> Catlainn Sionean,<sup>5</sup> Elizabeth DiNunno,<sup>5</sup> Cyprian Wejnert,<sup>5</sup> Gabriela Paz-  
9 Bailey,<sup>5</sup> for the National HIV Behavioral Surveillance Study Group  
10

11  
12 **Affiliations:**

13 1 Rollins School of Public Health of Emory University  
14 1518 Clifton Road NE,  
15 Atlanta, GA 30322 USA  
16

17  
18 2 ZevRoss SpatialAnalysis  
19 120 N Aurora St, Suite 3A  
20 Ithaca, NY 14850 USA  
21

22  
23 3 Institute for Infectious Disease Research  
24 National Development and Research Institutes  
25 71 West 23rd Street, 4th Fl  
26 NY, NY 10010 USA

27  
28 4 Baron Edmond de Rothschild Chemical Dependency Institute  
29 Mount Sinai Beth Israel  
30 39 Broadway, Suite 530  
31 New York NY 10006 USA

32  
33 5 Centers for Disease Control and Prevention  
34 1600 Clifton Rd NE  
35 Atlanta, GA 30333  
36

37 **Corresponding Author**

38  
39 Sabriya L. Linton, PhD, MPH  
40 Behavioral Sciences and Health Education  
41 Rollins School of Public Health of Emory University  
42 1518 Clifton Road NE, Room 552  
43 Atlanta, GA 30312  
44 Email: [sabriya.linton@emory.edu](mailto:sabriya.linton@emory.edu)  
45 Phone: 404-727-8295  
46 Fax: 404-727-1369  
47  
48  
49  
50  
51  
52  
53  
54  
55  
56  
57  
58  
59  
60

# Cross-sectional association between ZIP code-level gentrification and homelessness among a large community-based sample of people who inject drugs in 19 US cities

## Abstract

### Background

Housing instability has been associated with poor health outcomes among people who inject drugs (PWID). This study investigates associations of local-level housing and economic conditions with homelessness among a large sample of PWID, an underexplored topic to date.

### Methods

PWID in this cross-sectional study were recruited from 19 large cities in the US as part of National HIV Behavioral Surveillance (NHBS). PWID provided self-reported information on demographics, behaviors, and life events. Homelessness was defined as residing on the street, or in a shelter, single room occupancy hotel, or car; or temporarily residing with friends or relatives any time in the past year. Data on county-level rental housing unaffordability and demand for subsidized housing units, and ZIP code-level gentrification (e.g., index of percent increases in non-Hispanic white residents, household income, gross rent from 1990-2009) and economic deprivation were measured using data from the US Census Bureau and Department of Housing and Urban Development. Multilevel models evaluated associations of local economic and housing characteristics to homelessness.

### Results

Sixty percent (5,394/8,992) of participants reported homelessness in the past year. The multivariable model demonstrated that PWID living in ZIP codes with higher levels of gentrification had higher odds of past-year homelessness (gentrification: Adjusted odds ratio=1.11, 95% Confidence Interval=1.04, 1.17).

### Conclusions

Additional research is needed to determine the mechanisms through which gentrification increases homelessness among PWID to develop appropriate community-level interventions.

**Strengths and limitations**

- This study addresses gaps in prior literature by investigating the relationships of ZIP code-level economic deprivation and gentrification, and county-level unaffordable rental housing and demand for public housing, to homelessness.
- The cross-sectional design and targeted sampling strategy should be considered when interpreting the results from this study.

For peer review only

## Introduction

Safe and stable housing has been deemed a key social determinant of health by public health bodies, including the World Health Organization and United States Department of Health and Human Services.<sup>1,2</sup> As described by Aidala and Sumartojo, “*unsafe and unstable housing conditions serve as the intermediary by which inequities in social and economic conditions and policies influence health*”.<sup>3</sup> Consistent with this perspective, housing remains a key structural factor targeted by global Health in All Policies approaches and domestic structural interventions (e.g., Housing Opportunity for People Living with AIDS (HOPWA)).<sup>1,4</sup>

Despite declines in percentages of unsheltered homeless persons in the United States from 40% to 31% between 2007 and 2014, a recent study by the Department of Housing and Urban Development (HUD) reported that on a single night in 2014 more than 578,000 people experienced homelessness.<sup>5</sup> This suggests that the United States is far from attaining its goal of ending homelessness.

People who inject drugs (PWID) are particularly vulnerable to homelessness.<sup>6-14</sup> Homelessness among PWID has dire consequences for their health. Homelessness has been associated with relapse among former injectors,<sup>8,15,16</sup> and among former and active injectors, homelessness has been associated with injection and sexual risk behaviors,<sup>8,10,14,17-20</sup> the transmission of infectious diseases<sup>13</sup>, opiate overdose,<sup>21</sup> and lower rates of drug treatment enrollment and retention,<sup>18,22-24</sup> drug cessation<sup>15,16,25</sup>, and antiretroviral adherence among those who are HIV positive.<sup>26</sup>

Evaluations of “Housing First” interventions further support the importance of stable housing among PWID.<sup>17,27,28</sup> These interventions provide housing to unstably housed individuals without requiring participants to first engage in drug or mental health treatment. Although most of these evaluations have not been conducted exclusively among PWID, those conducted among individuals with co-occurring disorders (e.g., mental illness and substance use) suggest that Housing First interventions improve housing stability, drug treatment retention,<sup>27</sup> health behaviors and health outcomes.<sup>28,17</sup>

The determinants of homelessness that have been identified among PWID and other populations in prior literature have largely been individual characteristics, including socio-demographic factors, mental health status, history of substance use, HIV status, and social network characteristics.<sup>9,17,29,30</sup> With the exception of qualitative research,<sup>18,31</sup> most research has not explored the potential influence of local place-based factors on homelessness.

Homelessness has been hypothesized to result from several place-based factors, including unaffordable housing and economic deprivation. Homelessness has also been hypothesized to be a consequence of urban redevelopment and gentrification processes that may cause landlords to intentionally disinvest in maintenance and repair of properties that ultimately get repurposed or demolished and thereby reduce available affordable housing stock.<sup>32-36</sup> Similarly, the demolition of public housing complexes that occurred under the Housing Opportunities for People Everywhere policy in several cities, may have contributed to the loss of affordable housing stock. Urban redevelopment and gentrification may also reduce affordable housing stock by increasing rent and housing market value; increasing demand for supportive housing and housing subsidies (e.g., Section-8 vouchers); and potentially causing the needs of marginalized groups to go unmet.<sup>32-35,37-42</sup>

1 Empirical data is lacking, however, on the extent to which place-based factors relate to  
2 homelessness. One early study conducted among shelter residents in Philadelphia and  
3 New York City is among the few studies that have explored this line of research. This  
4 study demonstrated that the majority of shelter residents reported prior addresses that  
5 were located in economically deprived neighborhoods.<sup>43</sup>  
6

7 This current study provides a rare opportunity to further advance knowledge about the  
8 possible impacts of place-based factors on homelessness among PWID, by linking  
9 individual-level data on homelessness among a large community-based sample of PWID  
10 to administrative data on economic and housing conditions at ZIP code and county  
11 geographical levels. Increasing empirical evidence of the potential role of place-based  
12 factors on homelessness- above and beyond individual-level factors- may suggest  
13 potential structural interventions that should be implemented and reduce social  
14 stigma.<sup>44</sup>  
15

## 16 **Methods**

### 17 *NHBS study sample*

18 PWID were recruited by respondent-driven sampling (RDS) for the Centers for Disease  
19 Control and Prevention's 2009 National HIV Behavioral Surveillance (NHBS). NHBS  
20 sampling procedures have been described elsewhere.<sup>45</sup> Briefly, its 2009 PWID  
21 surveillance cycle was implemented in 20 metropolitan statistical areas (MSAs) with  
22 high AIDS prevalence in 2006.<sup>46</sup> Eligible participants included those who had not  
23 already participated in the 2009 cycle of NHBS; were  $\geq 18$  years; reported injection drug  
24 use in the past year; demonstrated evidence of injection (e.g., track marks); resided in an  
25 NHBS-eligible MSA; and provided oral consent. Participants enrolled at the San Juan-  
26 Bayamon site were excluded because administrative data on several place-based  
27 characteristics were not available for this MSA. A total of 9,882 participants met  
28 eligibility criteria in the remaining 19 MSAs.  
29

30 Analysis was restricted to 9,702 PWID who self-identified as Hispanic/Latino, non-  
31 Hispanic/Latino black, and non-Hispanic/Latino white.<sup>47</sup> Participants were excluded  
32 from the analytic sample if they had invalid/incomplete surveys (n=26); invalid or  
33 missing ZIP code information (n=499); were transgender persons who comprised too  
34 small a category to be analyzed (n=51); or were missing information on key covariates  
35 (n=134). The final analytic sample included 8,992 participants. Those excluded from  
36 analysis were more likely to be white (>10% difference) and live in the Western region of  
37 the US and less likely to live in the Midwestern region than those included in the analytic  
38 sample. Other characteristics measured in this study were not substantially different  
39 (>10%) between those included and excluded from analysis.  
40

### 41 *Data collection and measures*

42 Trained interviewers collected self-reported individual-level data on PWID, including  
43 demographics, behaviors, life events, and ZIP codes and counties where they resided  
44 using standardized questionnaires. Participants were assigned to MSAs and regions  
45 based on interview site. When possible, participants who reported homelessness at the  
46 time of their interview were assigned to the ZIP code where they reported they frequently  
47 slept. When participants lived in ZIP codes that crossed county lines they were assigned  
48 to the county where most participants living in that ZIP code reported residing (n=341).  
49  
50  
51  
52  
53  
54  
55  
56  
57  
58  
59  
60

1 Individual-level homelessness was defined as self-reported homelessness, or residing on  
2 the street, in a shelter, single room occupancy hotel, or car; or temporarily residing with  
3 friends or relatives at any time in the past 12 months.  
4

5 ZIP- and county-level factors were selected based on the conceptual framework  
6 described below (Figure 1).<sup>8,9,17,29,30,33,37-41,43,48</sup> Definitions and sources of these factors  
7 are detailed in Table 1. Factors were created using data from the 2009 HUD Picture of  
8 Subsidized Households and US Census Bureau's 1990 Decennial Census and 2007-2011  
9 American Community Survey (ACS). County-level factors were percent unaffordable  
10 rental units<sup>49</sup> among low-income households and average number of months that  
11 applicants were on waiting lists for assisted housing. ZIP code-level factors were  
12 economic deprivation<sup>50,51</sup> and gentrification<sup>38,40,52,53</sup> between 1990 and 2009.  
13

14 Individual-level covariates were also selected based on previous research<sup>8,9,17,29,30,33,37-  
15 41,43,48</sup> and included age, gender, race and ethnicity, full-time employment, and self-  
16 reported HIV status (i.e., indeterminate/unknown, negative, positive) at the time of the  
17 interview, and self-reported personal annual income dichotomized at the median  
18 (>\$5,000 USD vs ≤ \$5,000 USD), daily injection, binge drinking, non-injection drug  
19 use, having a main or casual sexual partner in the past year, and incarceration (i.e., held  
20 in a jail or prison for at least one day in the past year). Measures of poor mental health  
21 status, well-established predictors of homelessness, were not collected as part of NHBS.  
22  
23

#### 24 *Ethics*

25  
26 The Institutional Review Boards (IRBs) of Emory University and each NHBS site and the  
27 CDC approved study protocols.  
28

#### 29 *Statistical Analysis*

30  
31 The distributions of all characteristics were determined using descriptive statistics (i.e.,  
32 frequencies and percentages, and means and standard deviations). To prevent possible  
33 multicollinearity, the correlations between place-based characteristics were assessed.  
34 Univariate and multivariable multilevel logistic regression models were used to assess  
35 relationships of place-based factors to the odds of homelessness. Random intercepts  
36 were included for ZIP codes, counties, and MSAs. A multivariable model assessed the  
37 relationships of place-based factors significant at  $p\text{-value} < 0.20$  in univariate models to  
38 homelessness, controlling for individual-level covariates. We also explored whether the  
39 relationships of place-based factors to homelessness differed among Latino, black, and  
40 white participants through stratified analysis. Stata version 13 (StataCorp LP, College  
41 Station, TX).  
42  
43

#### 44 **Results**

##### 45 *Place characteristics*

46  
47 On average, participants resided in counties where 85.18% (standard deviation  
48 (SD)=6.15) of rental units among low-income households were unaffordable and the  
49 average number of months that applicants were on waiting lists for assisted housing was  
50 30.03 months (SD=17.65-Table 2). The mean gentrification score was 0.41 (1.45) among  
51 the ZIP codes where participants lived. On average, ZIP codes that scored above the  
52 mean were characterized by a 53% increase in percent of non-Hispanic white residents  
53 between 1990 and 2009, and a 20% increase in median gross rent and median  
54 household income (adjusted for inflation) between 1990 and 2009.  
55  
56  
57  
58  
59  
60



### *Participant characteristics*

The majority of participants were black (52%) and male (72%- Table 2). The mean age of participants was 45.76 years (10.54). Less than 5% of participants reported current full-time employment at the time of the interview and 61% earned an annual personal income of \$5,000 USD or less. Sixty percent of participants reported experiencing homelessness at some point during the last year.

### *Associations of place characteristics with homelessness among PWID*

In univariate models (Table 3), PWID who lived in ZIP codes with higher levels of gentrification had a significantly higher odds of homelessness in the past year (Odds ratio=1.13; 95% Confidence interval= 1.07, 1.18). PWID who lived in counties with greater percentages of unaffordable rental housing units among low-income households were less likely to report homelessness in the past year; this association was marginally significant (Odds ratio=0.97; 95% Confidence interval=0.94, 1.01; p-value=0.110). These associations did not substantially differ in magnitude and significance across different racial/ethnic groups of PWID (data not shown).

In the multivariable model, ZIP code-level gentrification remained significantly associated with homelessness (Table 3: Adjusted odds ratio=1.11; 95% Confidence interval= 1.04, 1.17). Specifically, the odds of homelessness increased by 17% with each standard deviation increase in ZIP code-level gentrification. The association between percentages of unaffordable rental housing units among low-income households and homelessness was no longer marginally significant (Adjusted odds ratio=0.99; Confidence interval=0.96, 1.02).

### **Discussion**

A high level of homelessness (60% in last year) was reported among this large sample of people who inject drugs, which not only highlights PWID's vulnerability to poor health outcomes but also raises concerns about the potential high societal costs that may result from homelessness, including increased health care costs.<sup>54</sup> To our knowledge this is among the first studies to empirically reveal relationships of local economic and housing stock characteristics to homelessness among people who inject drugs. Specifically, this study discovered a significant association between ZIP code-level gentrification from 1990-2009 and homelessness among PWID; this relationship did not vary across racial/ethnic groups. Because empirical investigations of the potential role of local economic and housing conditions to homelessness among the general population have been limited,<sup>43</sup> this paper also makes a new contribution to the larger body of research focused on homelessness and health.

The relationship between gentrification and homelessness in this analysis is supported by prior qualitative studies with predominantly low-income and racial/ethnic minority residents, which suggests that living in gentrifying areas can increase housing instability.<sup>31,33,38-41</sup> These studies report a combination of pathways through which gentrification can increase housing instability. Gentrification is a change in the socioeconomic character of a community that is largely accompanied by stark inflations of rental costs and property taxes.<sup>33,38,39</sup> Housing markets of gentrifying areas may further be changed by direct demolition or repurposing of low-income and affordable housing units into mixed-income and mix-used development<sup>31-33,38-41,55,56</sup>, a process that was widely implemented

1 by federally-funded public housing demolitions in several US cities (e.g., Housing  
2 Opportunities for People Everywhere).<sup>31,57</sup>

3  
4 Abrupt changes to the housing market in these ways can increase demand for affordable  
5 housing, shelters, and other safety-net services among low-to-moderate income  
6 residents who cannot afford inflated costs of living in gentrifying areas. As a result, the  
7 needs of the most marginalized and low-income groups, including PWID, may go  
8 unmet.<sup>31,42,55,56</sup> This is particularly concerning, given increasing rates of gentrification in  
9 several cities across the United States,<sup>58</sup> including those sampled in this study.

10  
11 Contrary to prior conceptual frameworks and hypotheses, we did not observe a  
12 statistically significant association between unaffordable housing and homelessness in  
13 this study. These findings, however, may not challenge the importance of increasing  
14 access to affordable housing and the potential positive health consequences that may  
15 result from such efforts. Because the US Census Bureau's ACS does not provide publicly  
16 available data on low-income households spending greater than 35% or more of their  
17 income on housing, we could not explore the potential impact of a higher threshold of  
18 affordability. Higher thresholds of 50% or more of income allocated to housing costs  
19 have been proposed by housing policy researchers to better measure the burden of  
20 housing-related costs among predominantly low-income populations.<sup>59</sup> The measure of  
21 subsidized housing units that we used in this study is also limited and may not accurately  
22 reflect demand for subsidized housing. In many cities, waiting lists for subsidized  
23 housing are closed to applicants at specific thresholds and thus exclude the waiting times  
24 of those who could not apply.

25  
26  
27  
28 It is plausible that factors not measured in this study may partly contribute to the  
29 relationship between gentrification and homelessness. Prior research demonstrates that  
30 gentrification and its common antecedent- urban redevelopment- are associated with  
31 reductions in crime.<sup>33,60,61</sup> These reductions may result from increases in law  
32 enforcement strategies that aim to prevent drug-related offenses and other "public  
33 nuisances" that might slow redevelopment and gentrification processes.<sup>32-34,42</sup> Perceived  
34 crime, and political capital among new residents may further increase law enforcement  
35 activities in gentrifying areas. Prior studies suggest that (more affluent) residents moving  
36 into gentrifying areas often have greater political power than (predominately low-income  
37 and racial/ethnic minority) long-term residents and are thereby more empowered in  
38 advocating for increased law enforcement.<sup>52,62,63</sup> Together these circumstances can  
39 increase arrests of people who possess and use substances, including PWID, and thereby  
40 increase their vulnerability to homelessness.<sup>8,64</sup>

#### 41 42 Limitations

43  
44 This study is cross-sectional, so temporal associations that might be observed in  
45 longitudinal analysis may go undetected, and causal interpretations cannot be made.  
46 The cross-sectional design also limits exploration of potential displacement of homeless  
47 participants as a result of gentrification. Prior studies have revealed links between  
48 gentrification, crime reduction efforts, and the displacement of homeless persons and  
49 homeless services.<sup>31,32</sup> Additionally, findings may not be generalizable to PWID living  
50 outside of the MSAs captured by NHBS and the extent to which RDS generated a  
51 representative sample in this study cannot be confirmed.<sup>65</sup>

52  
53  
54 We did not account for clustering of observations within RDS chains because of the high  
55 number of intercepts required for cross-classified multilevel modelling. We adjusted for  
56 place and socio-demographic factors, however, which may have partially controlled for  
57 intra-chain clustering.<sup>66,67</sup> Additionally, we could not distinguish different types or  
58  
59  
60

1 durations of homelessness among participants in this study because these data are not  
2 collected by NHBS.  
3

4 Lastly, ZIP codes were the smallest geographic unit used to describe areas where  
5 participants resided. ZIP codes may not adequately capture smaller boundaries within  
6 which housing and economic factors are most relevant to housing stability among PWID.  
7

## 8 Conclusion 9

10 Homelessness has been associated with the transmission of HIV/AIDS and HCV and  
11 lower levels of drug cessation among PWID and high societal costs. Identifying place-  
12 level predictors of homelessness can suggest changes in policy that can prevent these  
13 negative consequences. This study demonstrated a relationship between gentrification  
14 and homelessness among PWID. Future longitudinal studies should explore whether  
15 these associations are causal and identify potential mediators. Because this area of  
16 research has been underexplored among the general population, future research should  
17 include broader samples of residents. Growth in this line of research can inform urban  
18 planning strategies and community mobilization campaigns that are designed to curb the  
19 potential negative effects of gentrification by strengthening access to stable and  
20 permanent housing among low-income and marginalized populations.  
21  
22  
23  
24  
25  
26  
27  
28  
29  
30  
31  
32  
33  
34  
35  
36  
37  
38  
39  
40  
41  
42  
43  
44  
45  
46  
47  
48  
49  
50  
51  
52  
53  
54  
55  
56  
57  
58  
59  
60

## Acknowledgements

We thank the Centers and Disease Control and Prevention, and the National HIV Behavioral Surveillance System Study Group: Atlanta, GA: Jennifer Taussig, Shacara Johnson, Jeff Todd; Baltimore, MD: Colin Flynn, Danielle German; Boston, MA: Debbie Isenberg, Maura Driscoll, Elizabeth Hurwitz; Chicago, IL: Nikhil Prachand, Nanette Benbow; Dallas, TX: Sharon Melville, Richard Yeager, Jim Dyer, Alicia Novoa; Denver, CO: Mark Thrun, Alia Al-Tayyib; Detroit, MI: Emily Higgins, Eve Mokotoff, Vivian Griffin; Houston, TX: Aaron Sayegh, Jan Risser, Hafeez Rehman; Los Angeles, CA: Trista Bingham, Ekow Kwa Sey; Miami, FL: Lisa Metsch, David Forrest, Dano Beck, Gabriel Cardenas; Nassau-Suffolk, NY: Chris Nemeth, Lou Smith, Carol-Ann Watson; New Orleans, LA: William T. Robinson, DeAnn Gruber, Narquis Barak; New York City, NY: Alan Neaigus, Samuel Jenness, Travis Wendel, Camila Gelpi-Acosta, Holly Hagan; Newark, NJ: Henry Godette, Barbara Bolden, Sally D'Errico; Philadelphia, PA: Kathleen A. Brady, Althea Kirkland, Mark Shpaner; San Diego, CA: Vanessa Miguelino-Keasling, Al Velasco; San Francisco, CA: H. Fisher Raymond; San Juan, PR: Sandra Miranda De Leo'n, Yadira Rolo'n-Colo'n; Seattle, WA: Maria Courogen, Hanne Thiede, Richard Burt; St Louis, MO: Michael Herbert, Yelena Friedberg, Dale Wrigley, Jacob Fisher; Washington, DC: Marie Sansone, Tiffany West-Ojo, Manya Magnus, Irene Kuo; Behavioral Surveillance Team

We also thank the men and women who participated in NHBS and the staff at all NHBS sites.

Note: The findings and conclusions in this report are those of the authors and do not necessarily represent the views of the Centers for Disease Control and Prevention

## Contributorship statement

S. L. Linton conceptualized, designed, and conducted the analysis. S. L. Linton constructed and compiled place-level data and interpreted the analysis and results. M. E. Kelley and H. L. F. Cooper provided input on the analytic plan. M. E. Kelley, C. C. Karnes, Z. Ross, and M. E. Wolfe contributed to interpreting the geographical data, and S. Semaan, E. DiNenno, C. Sionean, C. Wejnert, and G. Paz-Bailey planned, designed, and oversaw data collection for NHBS. S. L. Linton, H. L. F. Cooper, M. E. Kelley, C. C. Karnes, Z. Ross, M. E. Wolfe, S. R. Friedman, D Des Jarlais, S. Semaan, B. Tempalski, C. Sionean, E. DiNenno, C. Wejnert, G. Paz-Bailey contributed to revising and finalizing the manuscript.

## Competing interests

No competing interests to report

## Funding

This research was supported by two grants from the National Institutes of Health: "Place Characteristics & Disparities in HIV in IDUS: A Multilevel Analysis of NHBS" (R01 DA035101; Cooper, PI) and the Emory Center for AIDS Research (P30 AI050409; Curran, PI).

1  
2  
3  
4  
5  
6  
7  
8  
9  
10  
11  
12  
13  
14  
15  
16  
17  
18  
19  
20  
21  
22  
23  
24  
25  
26  
27  
28  
29  
30  
31  
32  
33  
34  
35  
36  
37  
38  
39  
40  
41  
42  
43  
44  
45  
46  
47  
48  
49  
50  
51  
52  
53  
54  
55  
56  
57  
58  
59  
60

**Data sharing statement**

No additional data available

For peer review only

## References

1. Housing: Shared interests in health and Development. Social Determinants of Health Sectoral Briefing Series 1. . Geneva, Switzerland: World Health Organization.
2. Secretary's Advisory Committee on Health Promotion and Disease Prevention Objectives for 2020. Healthy People 2020: An Opportunity to Address the Societal Determinants of Health in the United States. . July 26, 2010. (Accessed April 14, 2016, at <http://www.healthypeople.gov/2010/hp2020/advisory/SocietalDeterminantsHealth.htm>.)
3. Aidala AA, Sumartojo E. Why Housing? *AIDS and Behavior* 2007;11:1-6.
4. U.S. Department of Housing and Urban Development. (Accessed April 14, 2016, at [http://portal.hud.gov/hudportal/HUD?src=/program\\_offices/comm\\_planning/aidshousing](http://portal.hud.gov/hudportal/HUD?src=/program_offices/comm_planning/aidshousing).)
5. The 2014 Annual Homeless Assessment Report (AHAR) to Congress. . Washington, DC: U.S. Department of Housing and Urban Development; 2014.
6. Mizuno Y, Purcell D, Borkowski TM, Knight K. The life priorities of HIV-seropositive injection drug users: findings from a community-based sample. *AIDS Behav* 2003;7:395-403.
7. Aidala AA, Lee G, Abramson DM, Messeri P, Siegler A. Housing need, housing assistance, and connection to HIV medical care. *AIDS Behav* 2007;11:101-15.
8. Linton SL, Celentano DD, Kirk GD, Mehta SH. The longitudinal association between homelessness, injection drug use, and injection-related risk behavior among persons with a history of injection drug use in Baltimore, MD. *Drug Alcohol Depend* 2013;132:457-65.
9. Song JY, Safaeian M, Strathdee SA, Vlahov D, Celentano DD. The prevalence of homelessness among injection drug users with and without HIV infection. *J Urban Health* 2000;77:678-87.
10. DeBeck K, Small W, Wood E, Li K, Montaner J, Kerr T. Public injecting among a cohort of injecting drug users in Vancouver, Canada. *J Epidemiol Community Health* 2009;63:81-6.
11. Krusi A, Fast D, Small W, Wood E, Kerr T. Social and structural barriers to housing among street-involved youth who use illicit drugs. *Health Soc Care Community* 2010;18:282-8.
12. Palepu A, Marshall BDL, Lai C, Wood E, Kerr T. Addiction treatment and stable housing among a cohort of injection drug users. *PLoS One* 2010;5:e11697.
13. Kim C, Kerr T, Li K, et al. Unstable housing and hepatitis C incidence among injection drug users in a Canadian setting. *Bmc Public Health* 2009;9:270.
14. Bluthenthal RN, Do DP, Finch B, Martinez A, Edlin BR, Kral AH. Community characteristics associated with HIV risk among injection drug users in the San Francisco Bay Area: a multilevel analysis. *J Urban Health* 2007;84:653-66.
15. Shah NG, Galai N, Celentano DD, Vlahov D, Strathdee SA. Longitudinal predictors of injection cessation and subsequent relapse among a cohort of injection drug users in Baltimore, MD, 1988-2000. *Drug Alcohol Depend* 2006;83:147-56.
16. Mehta SH, Sudarshi D, Srikrishnan AK, et al. Factors associated with injection cessation, relapse and initiation in a community-based cohort of injection drug users in Chennai, India. *Addiction* 2012;107:349-58.
17. Aidala A, Cross JE, Stall R, Harre D, Sumartojo E. Housing status and HIV risk behaviors: Implications for prevention and policy. *Aids and Behavior* 2005;9:251-65.
18. Dickson-Gomez J, Hilario H, Convey M, Corbett AM, Weeks M, Martinez M. The relationship between housing status and HIV risk among active drug users: a qualitative analysis. *Subst Use Misuse* 2009;44:139-62.

19. Bourgois P. The moral economies of homeless heroin addicts: confronting ethnography, HIV risk, and everyday violence in San Francisco shooting encampments. *Subst Use Misuse* 1998;33:2323-51.
20. Rhodes T, Singer M, Bourgois P, Friedman SR, Strathdee SA. The social structural production of HIV risk among injecting drug users. *Soc Sci Med* 2005;61:1026-44.
21. Sherman SG, Cheng Y, Kral AH. Prevalence and correlates of opiate overdose among young injection drug users in a large U.S. city. *Drug Alcohol Depend* 2007;88:182-7.
22. Shah NG, Celentano DD, Vlahov D, et al. Correlates of enrollment in methadone maintenance treatment programs differ by HIV-serostatus. *Aids* 2000;14:2035-43.
23. Appel PW, Ellison AA, Jansky HK, Oldak R. Barriers to enrollment in drug abuse treatment and suggestions for reducing them: opinions of drug injecting street outreach clients and other system stakeholders. *Am J Drug Alcohol Abuse* 2004;30:129-53.
24. Havens JR, Latkin CA, Pu M, et al. Predictors of opiate agonist treatment retention among injection drug users referred from a needle exchange program. *J Subst Abuse Treat* 2009;36:306-12.
25. Genberg BL, Gange SJ, Go VF, et al. The effect of neighborhood deprivation and residential relocation on long-term injection cessation among injection drug users (IDUs) in Baltimore, Maryland. *Addiction* 2011;106:1966-74.
26. Berg KM, Demas PA, Howard AA, Schoenbaum EE, Gourevitch MN, Arnsten JH. Gender differences in factors associated with adherence to antiretroviral therapy. *J Gen Intern Med* 2004;19:1111-7.
27. Appel PW, Tsemberis S, Joseph H, Stefancic A, Lambert-Wacey D. Housing First for severely mentally ill homeless methadone patients. *J Addict Dis* 2012;31:270-7.
28. Hawk M, Davis D. The effects of a harm reduction housing program on the viral loads of homeless individuals living with HIV/AIDS. *AIDS Care* 2012;24:577-82.
29. Davey-Rothwell MA, Latimore A, Hulbert A, Latkin CA. Sexual networks and housing stability. *Journal of Urban Health* 2011;88:759-66.
30. Mizuno Y, Purcell DW, Zhang J, et al. Predictors of current housing status among HIV-seropositive injection drug users (IDUs): results from a 1-year study. *AIDS and Behavior* 2008;13:165-72.
31. Kasinitz P. Gentrification and Homelessness: The Single Room Occupant and the Inner City Revival. *The Urban And Social Change Review* 1984;17:9-14.
32. Reese E, Deverteuil G, Thach L. 'Weak-Center' Gentrification and the Contradictions of Containment: Deconcentrating Poverty in Downtown Los Angeles. *International Journal of Urban and Regional Research* 2010;34:310-27.
33. Linton SL, Kennedy CE, Latkin CA, Celentano DD, Kirk GD, Mehta SH. "Everything that looks good ain't good!": Perspectives on urban redevelopment among persons with a history of injection drug use in Baltimore, Maryland. *Int J Drug Policy* 2013;24:605-13.
34. Curtis R. "Crack, Cocaine and Heroin: Drug Eras in Williamsburg, Brooklyn, 1960-2000". *Addiction Research & Theory* 2003;11:47-63.
35. Gomez MB. Race, class, power, and organizing in East Baltimore : rebuilding abandoned communities in America. Lanham, MD: Lexington Books; 2013.
36. Gomez MB, Muntaner C. Urban redevelopment and neighborhood health in East Baltimore, Maryland: The role of communitarian and institutional social capital. *Critical Public Health* 2005;15:83-102.
37. Johnson RA. African Americans and Homelessness Moving Through History. *J Black Stud* 2010;40:583-605.
38. Freeman L, Braconi F. Gentrification and displacement - New York City in the 1990s. *Journal of the American Planning Association* 2004;70:39-52.
39. Davila A. Dreams of place: Housing, gentrification, and the marketing of space in El Barrio. *Centro Journal* 2003;15:112-37.

- 1 40. Marcuse P. Gentrification, Abandonment, and Displacement: Connections,  
2 Causes, and Policy Responses in New York City. *Journal of Urban and Contemporary*  
3 *Law* 1985;28:195–240.
- 4 41. Fullilove MT. *Root shock: how tearing up city neighborhoods hurts American and*  
5 *what we can do about it.* First Edition ed. New York, NY: The Random House Publishing  
6 Group; 2004.
- 7 42. Whittle HJ, Palar K, Hufstedler LL, Seligman HK, Frongillo EA, Weiser SD. Food  
8 insecurity, chronic illness, and gentrification in the San Francisco Bay Area: An example  
9 of structural violence in United States public policy. *Soc Sci Med* 2015;143:154-61.
- 10 43. Culhane DP, Chang-Moo L, Wachter SM. Where the Homeless Come From: A  
11 Study of the Prior Address Distribution of Families  
12 Admitted to Public Shelters in New York City and Philadelphia. *Housing Policy Debate*  
13 1996;7:327-65.
- 14 44. Belcher JR, DeForge BR. Social Stigma and Homelessness: The Limits of Social  
15 Change. *Journal of Human Behavior in the Social Environment* 2012;22:929-46.
- 16 45. Gallagher KM, Sullivan PS, Lansky A, Onorato IM. Behavioral surveillance  
17 among people at risk for HIV infection in the U.S.: the National HIV Behavioral  
18 Surveillance System. *Public Health Rep* 2007;122 Suppl 1:32-8.
- 19 46. CDC. *HIV/AIDS Surveillance Report, 2006.* Atlanta: U.S. Department of Health  
20 and Human Services, Centers for Disease Control and Prevention; 2008.
- 21 47. OMB. *Provisional guidance on the implementation of the 1997 standards for*  
22 *federal data on race and ethnicity, Executive Office of the President, December 15. : U.S.*  
23 *Office of Management and Budget; 2000.*
- 24 48. Carter G. From Exclusion to Destitution: Race, Affordable Housing, and  
25 Homelessness. *Cityscape: A Journal of Policy Development and Research* 2011;13:33-70.
- 26 49. *American Community Survey and Puerto Rico Community Survey: 2011 Subject*  
27 *Definitions.* Washington, DC: United States Census Bureau; 2011.
- 28 50. Messer LC, Laraia BA, Kaufman JS, et al. The Development of a Standardized  
29 Neighborhood Deprivation Index. *Journal of Urban Health : Bulletin of the New York*  
30 *Academy of Medicine* 2006;83:1041-62.
- 31 51. Krieger N, Barbeau EM, Soobader MJ. Class matters: U.S. versus U.K. measures  
32 of occupational disparities in access to health services and health status in the 2000 U.S.  
33 National Health Interview Survey. *International journal of health services : planning,*  
34 *administration, evaluation* 2005;35:213-36.
- 35 52. Freeman L. *There goes the 'hood : views of gentrification from the ground up.*  
36 Philadelphia, PA: Temple University Press; 2006.
- 37 53. Huynh M, Maroko AR. Gentrification and Preterm Birth in New York City,  
38 2008–2010. *Journal of Urban Health : Bulletin of the New York Academy of Medicine*  
39 2014;91:211-20.
- 40 54. Sturtevant L, Viveiros J. How investing in housing can save on health care: a  
41 research review and comment on future directions for integrating housing and health  
42 services. Washington, DC: Center for Housing Policy, National Housing Conference;  
43 2016.
- 44 55. Vitale AS. The Safer Cities Initiative and the removal of the homeless.  
45 *Criminology & Public Policy* 2010;9:867-73.
- 46 56. Culhane DP. Tackling homelessness in Los Angeles' Skid Row. *Criminology &*  
47 *Public Policy* 2010;9:851-7.
- 48 57. Popkin S, Katz B, Cunningham K, Brown J, Gustafson M, Turner A. *A decade of*  
49 *HOPE VI: research findings and policy challenges* Washington, DC: The Urban Institute;  
50 2004.
- 51 58. Hartley D. *Gentrification and financial health.* Cleveland, OH: Federal Reserve  
52 Bank of Cleveland; 2013.
- 53 59. Belsky ES, Goodman J, Drew R. *Measuring the nation's rental housing*  
54 *affordability problems.* Cambridge, MA: Joint Center for Housing Studies; 2005.



- 1 60. Kreager DA, Lyons CJ, Hays ZR. URBAN REVITALIZATION AND SEATTLE  
2 CRIME, 1982–2000. *Social problems* 2011;58:615-39.
- 3 61. Linton SL, Jennings JM, Latkin CA, Gomez MB, Mehta SH. Application of Space-  
4 Time Scan Statistics to Describe Geographic and Temporal Clustering of Visible Drug  
5 Activity. *Journal of Urban Health : Bulletin of the New York Academy of Medicine*  
6 2014;91:940-56.
- 7 62. Hyra D. The back-to-the-city movement: Neighbourhood redevelopment and  
8 processes of political and cultural displacement. *Urban Studies* 2014;52:1753-73.
- 9 63. Gibbs Knotts H, Haspel M. The Impact of Gentrification on Voter Turnout\*.  
10 *Social Science Quarterly* 2006;87:110-21.
- 11 64. Cheng T, Wood E, Feng C, et al. Transitions into and out of homelessness among  
12 street-involved youth in a Canadian setting. *Health & place* 2013;23:122-7.
- 13 65. McCreesh N, Frost S, Seeley J, et al. Evaluation of Respondent-Driven Sampling.  
14 *Epidemiology (Cambridge, Mass)* 2012;23:138-47.
- 15 66. Abdul Quader A, Heckathorn D, McKnight C, et al. Effectiveness of respondent-  
16 driven sampling for recruiting drug users in New York City: findings from a pilot study.  
17 *Journal of Urban Health* 2006;83:459-76.
- 18 67. Burt RD, Hagan H, Sabin K, Thiede H. Evaluating respondent-driven sampling in  
19 a major metropolitan area: comparing injection drug users in the 2005 Seattle area  
20 National HIV Behavioral Surveillance System survey with participants in the RAVEN  
21 and Kiwi Studies. *Annals of Epidemiology* 2010;20:159-67.
- 22  
23  
24  
25  
26  
27  
28  
29  
30  
31  
32  
33  
34  
35  
36  
37  
38  
39  
40  
41  
42  
43  
44  
45  
46  
47  
48  
49  
50  
51  
52  
53  
54  
55  
56  
57  
58  
59  
60

**Figure 1. Conceptual framework linking local economic and housing factors to homelessness among people who inject drugs (PWID)** <sup>8,9,17,29,30,33,37-41,43,48</sup>

**Table 1. Definition and sources of place-based exposures**

| Place characteristic                                                                | Measure                                                                                                                                                                                                                                                                                                                      | Source                                                                             |
|-------------------------------------------------------------------------------------|------------------------------------------------------------------------------------------------------------------------------------------------------------------------------------------------------------------------------------------------------------------------------------------------------------------------------|------------------------------------------------------------------------------------|
| <b>County</b>                                                                       |                                                                                                                                                                                                                                                                                                                              |                                                                                    |
| Percent unaffordable rental units among low-income households                       | Among households earning <\$10,000 USD annually, the number of occupied rental units <sup>1</sup> where residents spent $\geq 35\%$ of their annual household income on rent, divided by the total number of households earning household income less than \$10,000                                                          | 2007-2011 American Community Survey                                                |
| Average number of months that applicants were on waiting lists for assisted housing | Average months on waiting list among new admissions for Department of Housing and Urban Development assisted housing programs                                                                                                                                                                                                | 2009 Picture of Subsidized Households, Department of Housing and Urban Development |
| <b>ZIP code</b>                                                                     |                                                                                                                                                                                                                                                                                                                              |                                                                                    |
| Economic deprivation <sup>2</sup>                                                   | Index of % residents employed in low-wage occupations (e.g. service, sales, construction, manufacturing, transportation), % households in poverty, % female-headed households with dependent children <18 years, % households on public assistance, % low-income households, % without high school diploma/GED, % unemployed | 2007-2011 American Community Survey                                                |

<sup>1</sup> The US Census Bureau defines housing units to be a house, an apartment, a mobile home or trailer, a group of rooms, or a single room that is occupied. Group quarters (e.g., treatment centers, correctional facilities, and homeless shelters) are not defined as housing units.<sup>49</sup> American Community Survey and Puerto Rico Community Survey: 2011 Subject Definitions. Washington, DC: United States Census Bureau; 2011.

<sup>2</sup> The economic deprivation index was informed by: 50. Messer LC, Laraia BA, Kaufman JS, et al. The Development of a Standardized Neighborhood Deprivation Index. *Journal of Urban Health : Bulletin of the New York Academy of Medicine* 2006;83:1041-62, 51. Krieger N, Barbeau EM, Soobader MJ. Class matters: U.S. versus U.K. measures of occupational disparities in access to health services and health status in the 2000 U.S. National Health Interview Survey. *International journal of health services : planning, administration, evaluation* 2005;35:213-36. Principle components analysis (PCA) was conducted to confirm the dimensionality of the items across ZIP codes of all MSAs. Once confirmed through PCA, items were standardized by z-score, weighted by factor loadings, and summed to create the index.

|                             |                                                                                                                                                                                                                                                                      |                                                                                  |
|-----------------------------|----------------------------------------------------------------------------------------------------------------------------------------------------------------------------------------------------------------------------------------------------------------------|----------------------------------------------------------------------------------|
| Gentrification <sup>3</sup> | Index of percent change in the following indicators between 1990 and 2009: % poverty, % college or more among adults aged >= 25, % White, median household income, median monthly rent. Economic factors were adjusted for inflation using the Consumer Price Index. | Geolytics 1990 Long Form in 2010 Boundaries; 2007-2011 American Community Survey |
|-----------------------------|----------------------------------------------------------------------------------------------------------------------------------------------------------------------------------------------------------------------------------------------------------------------|----------------------------------------------------------------------------------|

**Table 2. Distributions of ZIP code, county, and participant characteristics among 8,992 people who inject drugs living in 19 US metro areas in 2009**

| Characteristics                                                                     | Total<br>N (%)<br>or Mean (Standard<br>deviation) |
|-------------------------------------------------------------------------------------|---------------------------------------------------|
|                                                                                     | N= 8,992                                          |
| <b>Region<sup>4</sup></b>                                                           |                                                   |
| Northeast                                                                           | 2,122 (23.55)                                     |
| South                                                                               | 3,605 (40.01)                                     |
| Midwest                                                                             | 938 (10.41)                                       |
| West                                                                                | 2,345 (26.03)                                     |
| <b>MSA (N=19)</b>                                                                   |                                                   |
| <b>County (N=51)</b>                                                                |                                                   |
| Percent unaffordable rental units among low-income households                       | 85.18 (6.87)                                      |
| Average number of months that applicants were on waiting lists for assisted housing | 30.03 (17.65)                                     |
| <b>ZIP code (N=939)</b>                                                             |                                                   |
| Economic deprivation                                                                | 2.28 (2.23)                                       |
| Gentrification                                                                      | 0.41 (1.45)                                       |
| <b>Participant characteristics</b>                                                  |                                                   |
| Current age                                                                         | 45.76 (10.54)                                     |
| Male                                                                                | 6,450 (71.73)                                     |
| Race/ethnicity                                                                      |                                                   |

<sup>3</sup> The gentrification measure was informed by: 38. Freeman L, Braconi F. Gentrification and displacement - New York City in the 1990s. *Journal of the American Planning Association* 2004;70:39-52, 40. Marcuse P. Gentrification, Abandonment, and Displacement: Connections, Causes, and Policy Responses in New York City. *Journal of Urban and Contemporary Law* 1985;28:195-240, 52. Freeman L. *There goes the 'hood : views of gentrification from the ground up*. Philadelphia, PA: Temple University Press; 2006, 53. Huynh M, Maroko AR. Gentrification and Preterm Birth in New York City, 2008-2010. *Journal of Urban Health : Bulletin of the New York Academy of Medicine* 2014;91:211-20. Principle components analysis (PCA) was conducted to confirm the dimensionality of the items across ZIP codes of all MSAs. Once confirmed through PCA, items were standardized by z-score, weighted by factor loadings, and summed to create the index.

<sup>4</sup> The Northeast region includes the MSAs of Boston, Massachusetts; Nassau-Suffolk, New York; New York, New York; Newark, New Jersey; and Philadelphia, Pennsylvania. South region includes Atlanta, Georgia; Baltimore, Maryland; Dallas, Texas; Houston, Texas; Miami, Florida; New Orleans, Louisiana; and District of Columbia. Midwest region includes Chicago, Illinois and Detroit, Michigan. West region includes Denver, Colorado; Los Angeles, California; San Diego, California; San Francisco, California; and Seattle, Washington.

|                                              |               |
|----------------------------------------------|---------------|
| Latino                                       | 1,622 (18.04) |
| Black                                        | 4,662 (51.85) |
| White                                        | 2,708 (30.12) |
| Annual income ( $\leq$ 5000 USD)             | 5,488 (61.03) |
| Full-time employment                         | 394 (4.38)    |
| Incarceration                                | 3,281 (36.50) |
| Homelessness                                 | 5,394 (59.99) |
| Daily injection                              | 2,310 (25.69) |
| Binge drinking                               | 4,939 (54.93) |
| Type of sexual partner in the past 12 months |               |
| Main                                         | 4,454 (49.53) |
| Casual                                       | 4,370 (48.60) |
| Non-injection drug use                       | 6,765 (75.23) |
| Recent HIV test result                       |               |
| Negative result on most recent HIV test      | 6,986 (77.69) |
| Positive result on most recent HIV test      | 495 (5.50)    |

**Table 3. Association of ZIP code, county, and participant characteristics with recent homelessness among people who inject drugs from 19 US metro areas in 2009**

|                                                                                     | Univariate model<br>Odds ratio(95%<br>Confidence interval) | Multivariable model<br>Adjusted Odds ratio (95%<br>Confidence interval) * |
|-------------------------------------------------------------------------------------|------------------------------------------------------------|---------------------------------------------------------------------------|
| Intercept                                                                           |                                                            | 19.58 (1.13, 339.80)                                                      |
| <b>Region</b>                                                                       |                                                            |                                                                           |
| Northeast (Reference)                                                               | 1.00                                                       |                                                                           |
| South                                                                               | 1.19 (0.73, 1.93)                                          | --                                                                        |
| Midwest                                                                             | 0.71 (0.33, 1.55)                                          | --                                                                        |
| West                                                                                | 1.33 (0.77, 2.28)                                          | --                                                                        |
| <b>MSA (N=19)</b>                                                                   |                                                            |                                                                           |
| Random intercept variance                                                           | 0.06 (0, 2.61)                                             | 0.06 (0, 2.00)                                                            |
| <b>County(N=51)</b>                                                                 |                                                            |                                                                           |
| Random intercept variance                                                           | 0.26 (0.10, 0.70)                                          | 0.21 (0.07, 0.69)                                                         |
| Percent unaffordable rental units among low-income households                       | 0.97 (0.94, 1.01)                                          | 0.99 (0.96, 1.02)                                                         |
| Average number of months that applicants were on waiting lists for assisted housing | 1.00 (0.98, 1.01)                                          | --                                                                        |
| <b>ZIP code (N=937)</b>                                                             |                                                            |                                                                           |
| Random intercept variance                                                           | 0.31 (0.23, 0.43)                                          | 0.17 (0.11, 0.26)                                                         |
| Economic deprivation                                                                | 0.98 (0.95, 1.02)                                          |                                                                           |
| Gentrification                                                                      | 1.13 (1.07, 1.18)                                          | 1.11 (1.04, 1.17)                                                         |
| <b>Participant Characteristics</b>                                                  |                                                            |                                                                           |
| Current age                                                                         | 0.97 (0.96, 0.97)                                          | 0.98 (0.97, 0.98)                                                         |
| Sex (1=male)                                                                        | 0.88 (0.80, 0.98)                                          | 0.81 (0.73, 0.91)                                                         |
| Race/ethnicity                                                                      |                                                            |                                                                           |
| White (reference)                                                                   | 1.00                                                       | 1.00                                                                      |
| Black                                                                               | 0.66 (0.58, 0.75)                                          | 0.76 (0.66, 0.87)                                                         |
| Latino                                                                              | 0.87 (0.75, 1.01)                                          | 0.83 (0.71, 0.97)                                                         |
| Annual income ( $\leq$ 5,000 USD)                                                   | 0.48 (0.44, 0.53)                                          | 0.48 (0.44, 0.53)                                                         |

|    |                                                            |                   |                   |
|----|------------------------------------------------------------|-------------------|-------------------|
| 1  | vs. more)                                                  |                   |                   |
| 2  | Full-time employment                                       | 0.34 (0.27, 0.42) | 0.38 (0.30, 0.49) |
| 3  | Incarceration                                              | 2.19 (1.98, 2.42) | 1.84 (1.65, 2.05) |
| 4  | Daily injection (vs. less than daily)                      | 0.81 (0.73, 0.91) | 0.85 (0.76, 0.96) |
| 5  | Binge drinking                                             | 1.51 (1.38, 1.66) | 1.30 (1.18, 1.44) |
| 6  | Non-injection drug use                                     | 1.41 (1.27, 1.57) | 1.23 (1.10, 1.37) |
| 7  | Type of sexual partner in the past 12 months               |                   |                   |
| 8  | None                                                       | 1.00              | 1.00              |
| 9  | Main                                                       | 1.15 (0.82, 1.60) | 1.14 (0.81, 1.60) |
| 10 | Casual                                                     | 2.10 (1.91, 2.31) | 1.76 (1.60, 1.95) |
| 11 | Recent self-reported HIV test result                       |                   |                   |
| 12 | Indeterminate result/or did not receive result (reference) | 1.00              | 1.00              |
| 13 | Negative result                                            | 0.78 (0.69, 0.88) | 0.86 (0.76, 0.99) |
| 14 | Positive result                                            | 0.49 (0.39, 0.62) | 0.63 (0.50, 0.80) |

15 \* The multivariable model assessed the relationships of place-based factors significant at  
 16 a p-value<0.20 in univariate models to homelessness, controlling for individual-level  
 17 confounders.  
 18  
 19  
 20  
 21  
 22  
 23  
 24  
 25  
 26  
 27  
 28  
 29  
 30  
 31  
 32  
 33  
 34  
 35  
 36  
 37  
 38  
 39  
 40  
 41  
 42  
 43  
 44  
 45  
 46  
 47  
 48  
 49  
 50  
 51  
 52  
 53  
 54  
 55  
 56  
 57  
 58  
 59  
 60

1  
2  
3  
4  
5  
6  
7  
8  
9  
10  
11  
12  
13  
14  
15  
16  
17  
18  
19  
20  
21  
22  
23  
24  
25  
26  
27  
28  
29  
30  
31  
32  
33  
34  
35  
36  
37  
38  
39  
40  
41  
42  
43  
44  
45  
46  
47  
48  
49  
50  
51  
52  
53  
54  
55  
56  
57  
58  
59  
60

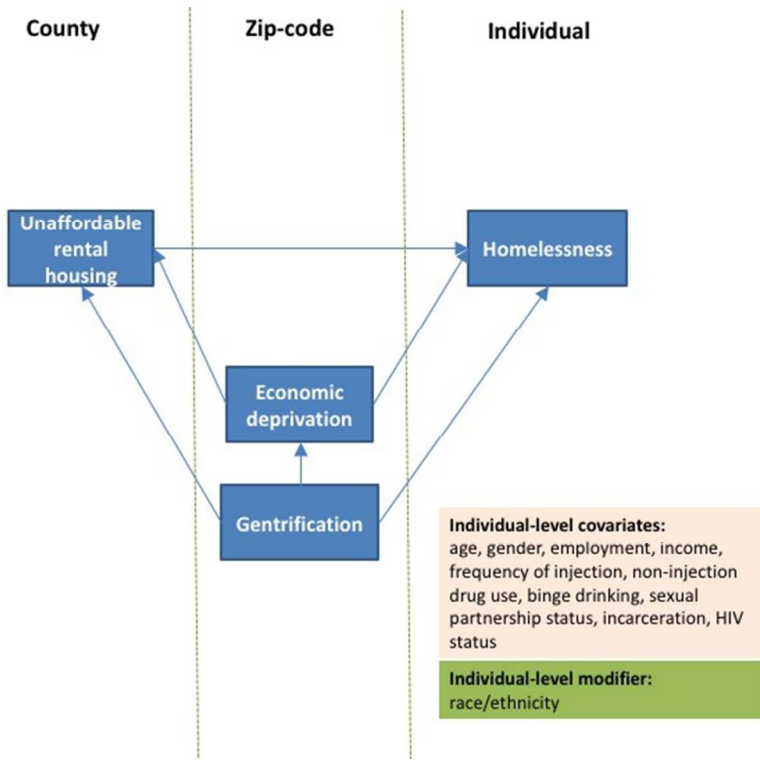

254x190mm (72 x 72 DPI)

ew only

## STROBE Statement—checklist of items that should be included in reports of observational studies

|                              | Item No | Recommendation                                                                                                                                                                                                                                                                                                                                                                                                                                                                                                                                                                                                                                                                                          |
|------------------------------|---------|---------------------------------------------------------------------------------------------------------------------------------------------------------------------------------------------------------------------------------------------------------------------------------------------------------------------------------------------------------------------------------------------------------------------------------------------------------------------------------------------------------------------------------------------------------------------------------------------------------------------------------------------------------------------------------------------------------|
| <b>Title and abstract</b>    | 1       | (a) Indicate the study's design with a commonly used term in the title or the abstract<br>Included in abstract on page 3<br>(b) Provide in the abstract an informative and balanced summary of what was done and what was found Page 3                                                                                                                                                                                                                                                                                                                                                                                                                                                                  |
| <b>Introduction</b>          |         |                                                                                                                                                                                                                                                                                                                                                                                                                                                                                                                                                                                                                                                                                                         |
| Background/rationale         | 2       | Explain the scientific background and rationale for the investigation being reported<br>Pages 4-5                                                                                                                                                                                                                                                                                                                                                                                                                                                                                                                                                                                                       |
| Objectives                   | 3       | State specific objectives, including any prespecified hypotheses Page 5                                                                                                                                                                                                                                                                                                                                                                                                                                                                                                                                                                                                                                 |
| <b>Methods</b>               |         |                                                                                                                                                                                                                                                                                                                                                                                                                                                                                                                                                                                                                                                                                                         |
| Study design                 | 4       | Present key elements of study design early in the paper Page 5                                                                                                                                                                                                                                                                                                                                                                                                                                                                                                                                                                                                                                          |
| Setting                      | 5       | Describe the setting, locations, and relevant dates, including periods of recruitment, exposure, follow-up, and data collection Page 5-6                                                                                                                                                                                                                                                                                                                                                                                                                                                                                                                                                                |
| Participants                 | 6       | (a) <i>Cohort study</i> —Give the eligibility criteria, and the sources and methods of selection of participants. Describe methods of follow-up<br><i>Case-control study</i> —Give the eligibility criteria, and the sources and methods of case ascertainment and control selection. Give the rationale for the choice of cases and controls<br><i>Cross-sectional study</i> —Give the eligibility criteria, and the sources and methods of selection of participants Page 5<br>(b) <i>Cohort study</i> —For matched studies, give matching criteria and number of exposed and unexposed<br><i>Case-control study</i> —For matched studies, give matching criteria and the number of controls per case |
| Variables                    | 7       | Clearly define all outcomes, exposures, predictors, potential confounders, and effect modifiers. Give diagnostic criteria, if applicable Pages 5-6                                                                                                                                                                                                                                                                                                                                                                                                                                                                                                                                                      |
| Data sources/<br>measurement | 8*      | For each variable of interest, give sources of data and details of methods of assessment (measurement). Describe comparability of assessment methods if there is more than one group Pages 5-6, 17-18 in Table 1                                                                                                                                                                                                                                                                                                                                                                                                                                                                                        |
| Bias                         | 9       | Describe any efforts to address potential sources of bias Page 9                                                                                                                                                                                                                                                                                                                                                                                                                                                                                                                                                                                                                                        |
| Study size                   | 10      | Explain how the study size was arrived at Page 5                                                                                                                                                                                                                                                                                                                                                                                                                                                                                                                                                                                                                                                        |
| Quantitative variables       | 11      | Explain how quantitative variables were handled in the analyses. If applicable, describe which groupings were chosen and why Pages 5-6                                                                                                                                                                                                                                                                                                                                                                                                                                                                                                                                                                  |
| Statistical methods          | 12      | (a) Describe all statistical methods, including those used to control for confounding Page 6<br>(b) Describe any methods used to examine subgroups and interactions Page 6<br>(c) Explain how missing data were addressed Page 5<br>(d) <i>Cohort study</i> —If applicable, explain how loss to follow-up was addressed<br><i>Case-control study</i> —If applicable, explain how matching of cases and controls was addressed<br><i>Cross-sectional study</i> —If applicable, describe analytical methods taking account of sampling strategy Page 7<br>(e) Describe any sensitivity analyses N/A: None performed                                                                                       |

Continued on next page

For peer review only

1  
2  
3  
4  
5  
6  
7  
8  
9  
10  
11  
12  
13  
14  
15  
16  
17  
18  
19  
20  
21  
22  
23  
24  
25  
26  
27  
28  
29  
30  
31  
32  
33  
34  
35  
36  
37  
38  
39  
40  
41  
42  
43  
44  
45  
46  
47  
48  
49  
50  
51  
52  
53  
54  
55  
56  
57  
58  
59  
60



**Results**

|                  |     |                                                                                                                                                                                                                                                                                                                                                                                                                                                                    |
|------------------|-----|--------------------------------------------------------------------------------------------------------------------------------------------------------------------------------------------------------------------------------------------------------------------------------------------------------------------------------------------------------------------------------------------------------------------------------------------------------------------|
| Participants     | 13* | (a) Report numbers of individuals at each stage of study—eg numbers potentially eligible, examined for eligibility, confirmed eligible, included in the study, completing follow-up, and analysed Page 5<br>(b) Give reasons for non-participation at each stage Page 5<br>(c) Consider use of a flow diagram Described in manuscript; no visual provided                                                                                                          |
| Descriptive data | 14* | (a) Give characteristics of study participants (eg demographic, clinical, social) and information on exposures and potential confounders Page 7, 18-19<br>(b) Indicate number of participants with missing data for each variable of interest Page 5<br>(c) <i>Cohort study</i> —Summarise follow-up time (eg, average and total amount)                                                                                                                           |
| Outcome data     | 15* | <i>Cohort study</i> —Report numbers of outcome events or summary measures over time<br><i>Case-control study</i> —Report numbers in each exposure category, or summary measures of exposure<br><i>Cross-sectional study</i> —Report numbers of outcome events or summary measures Page 7, 18-19                                                                                                                                                                    |
| Main results     | 16  | (a) Give unadjusted estimates and, if applicable, confounder-adjusted estimates and their precision (eg, 95% confidence interval). Make clear which confounders were adjusted for and why they were included Pages 6, 19-20<br>(b) Report category boundaries when continuous variables were categorized Page 6<br>(c) If relevant, consider translating estimates of relative risk into absolute risk for a meaningful time period N/A- no relative risk reported |
| Other analyses   | 17  | Report other analyses done—eg analyses of subgroups and interactions, and sensitivity analyses Pages 6, 8, and 10                                                                                                                                                                                                                                                                                                                                                  |

**Discussion**

|                  |    |                                                                                                                                                                                       |
|------------------|----|---------------------------------------------------------------------------------------------------------------------------------------------------------------------------------------|
| Key results      | 18 | Summarise key results with reference to study objectives Pages 7-10                                                                                                                   |
| Limitations      | 19 | Discuss limitations of the study, taking into account sources of potential bias or imprecision. Discuss both direction and magnitude of any potential bias Page 9                     |
| Interpretation   | 20 | Give a cautious overall interpretation of results considering objectives, limitations, multiplicity of analyses, results from similar studies, and other relevant evidence Pages 7-10 |
| Generalisability | 21 | Discuss the generalisability (external validity) of the study results Page 9                                                                                                          |

**Other information**

|         |    |                                                                                                                                                                       |
|---------|----|-----------------------------------------------------------------------------------------------------------------------------------------------------------------------|
| Funding | 22 | Give the source of funding and the role of the funders for the present study and, if applicable, for the original study on which the present article is based Page 11 |
|---------|----|-----------------------------------------------------------------------------------------------------------------------------------------------------------------------|

\*Give information separately for cases and controls in case-control studies and, if applicable, for exposed and unexposed groups in cohort and cross-sectional studies.

**Note:** An Explanation and Elaboration article discusses each checklist item and gives methodological background and published examples of transparent reporting. The STROBE checklist is best used in conjunction with this article (freely available on the Web sites of PLoS Medicine at <http://www.plosmedicine.org/>, Annals of Internal Medicine at <http://www.annals.org/>, and Epidemiology at <http://www.epidem.com/>). Information on the STROBE Initiative is available at [www.strobe-statement.org](http://www.strobe-statement.org).
